1 **TITLE: A combination of metagenomic and cultivation approaches reveals hypermutator**  
2 **phenotypes within *Vibrio cholerae* infected patients.**

3 **AUTHORS:** Inès Levade<sup>1</sup>, Ashraful I. Khan<sup>2</sup>, Fahima Chowdhury<sup>2</sup>, Stephen B. Calderwood<sup>3,4,5</sup>,  
4 Edward T. Ryan<sup>3,4</sup>, Jason B. Harris<sup>3,6</sup>, Regina C. LaRocque<sup>3,4</sup>, Taufiqur R. Bhuiyan<sup>2</sup>, Firdausi  
5 Qadri<sup>2</sup>, Ana A. Weil<sup>7</sup>, B. Jesse Shapiro<sup>1,8,9\*</sup>

6

7 <sup>1</sup>Department of Biological Sciences, University of Montreal, Montreal, Quebec, Canada.

8 <sup>2</sup>Center for Vaccine Sciences, International Centre for Diarrhoeal Disease Research, Dhaka,  
9 Bangladesh

10 <sup>3</sup>Division of Infectious Diseases, Massachusetts General Hospital, Boston, MA, USA

11 <sup>4</sup>Department of Medicine, Harvard Medical School, Boston, MA USA

12 <sup>5</sup>Department of Microbiology, Harvard Medical School, Boston, MA USA

13 <sup>6</sup>Department of Pediatrics, Harvard Medical School, Boston, MA, USA

14 <sup>7</sup>Division of Allergy and Infectious Diseases, University of Washington, Seattle, WA, USA

15 <sup>8</sup>Department of Microbiology and Immunology, McGill University, Montreal, QC, Canada

16 <sup>9</sup>McGill Genome Centre, Montreal, QC, Canada

17

18 **CORRESPONDING AUTHOR:** jesse.shapiro@mcgill.ca

19

20

21 **ABSTRACT**

22

23 *Vibrio cholerae* can cause a range of symptoms in infected patients, ranging from severe diarrhea  
24 to asymptomatic infection. Previous studies using whole genome sequencing (WGS) of multiple  
25 bacterial isolates per patient have shown that *Vibrio cholerae* can evolve a modest amount of  
26 genetic diversity during symptomatic infection. Little is known about *V. cholerae* genetic  
27 diversity within asymptomatic infected patients. To achieve increased resolution in the detection  
28 of *Vibrio cholerae* diversity within individual infections, we applied culture-based population  
29 genomics and metagenomics to a cohort of symptomatic and asymptomatic cholera patients.  
30 While the metagenomic approach allowed us to detect more mutations in symptomatic patients  
31 compared to the culture-based approach, WGS of isolates was still necessary to detect *V.*  
32 *cholerae* diversity in asymptomatic carriers, likely due to their low *Vibrio cholerae* load. We  
33 found that symptomatic and asymptomatic patients contain similar levels of within-patient  
34 diversity, and discovered *V. cholerae* hypermutators in some patients. While hypermutators  
35 appeared to generate mostly selectively neutral mutations, non-mutators showed signs of  
36 convergent mutation across multiple patients, suggesting *V. cholerae* adaptation within hosts. Our  
37 results highlight the power of metagenomics combined with isolate sequencing to characterize  
38 within-patient diversity in acute *V. cholerae* infection and asymptomatic infection, while  
39 providing evidence for hypermutator phenotypes within cholera patients.

40 **IMPORTANCE**

41 Pathogen evolution within patients can impact phenotypes such as drug resistance and virulence,  
42 potentially affecting clinical outcomes. *V. cholerae* infection can result in life-threatening  
43 diarrheal disease, or asymptomatic infection. Here we describe whole-genome sequencing of *V.*  
44 *cholerae* isolates and culture-free metagenomic sequencing from stool of symptomatic cholera  
45 patients and asymptomatic carriers. Despite the acuteness of cholera infections, we found  
46 evidence for adaptive mutations in the *V. cholerae* genome that occur independently and  
47 repeatedly within multiple symptomatic patients. We also identified *V. cholerae* hypermutator  
48 phenotypes within 6 out of 14 patients, which appear to generate mainly neutral or deleterious  
49 mutations. Our work sets the stage for future studies of the role of hypermutators and within-  
50 patient evolution in explaining the variation from asymptomatic carriage to symptomatic cholera.

51  
52 **KEYWORDS:** *Vibrio cholerae*, cholera, metagenomics, within-patient evolution, hypermutation,  
53 asymptomatic carriage

54

## 55 INTRODUCTION

56 Infection with *Vibrio cholerae*, the etiological agent of cholera, causes a clinical spectrum  
57 of symptoms that range from asymptomatic colonization of the intestine to severe watery diarrhea  
58 that can lead to death. Although absent from most resource-rich countries, this severe diarrheal  
59 disease still plagues many developing nations. According to the WHO, there are an estimated 1.3  
60 to 4.0 million cases of cholera each year, with 21,000 to 143,000 deaths worldwide (Ali et al.  
61 2015). Cholera predominantly occurs in endemic areas, but can also cause explosive outbreaks as  
62 seen in Haiti in 2010 or in Yemen, where over 2.2 million cases are suspected since 2016 (Weil,  
63 Ivers, et Harris 2011; Camacho et al. 2018). Although cholera vaccines have reduced disease in  
64 some areas, the increasing number of people lacking access to sanitation and safe drinking water,  
65 the emergence of a pandemic lineage of *V. cholerae* with increased virulence (Satchell et al.  
66 2016), and environmental persistence of this waterborne pathogen underscore the need to  
67 understand and interrupt transmission of this disease.

68 Cholera epidemiology and evolutionary dynamics have been studied by high-throughput  
69 sequencing technologies and new modeling approaches, at a global and local scale (Weil et Ryan  
70 2018; Domman et al. 2018). Yet, many questions remain regarding asymptomatic carriers of *V.*  
71 *cholerae*, including their role and importance in the transmission chain during an epidemic (King  
72 et al. 2008; Phelps, Simonsen, et Jensen 2019). Numerous observational studies have identified  
73 host factors that could impact the severity of symptoms, including lack of pre-existing immunity,  
74 blood group O status, age, polymorphisms in genes of the innate immune system, or variation in  
75 the gut microbiome (Harris et al. 2005; 2008; Weil, Khan, et al. 2009; Midani et al. 2018; Levade  
76 et al. 2020).

77 Recent studies have shown that despite the acute nature of cholera infection, which  
78 typically lasts only a few days, genetic diversity can appear and be detected in a *V. cholerae*

79 population infecting individual patients (Seed et al. 2014; Levade et al. 2017). In a previous  
80 study, we sampled multiple *V. cholerae* isolates from each of eight patients (five from  
81 Bangladesh and three from Haiti) and sequenced 122 bacterial genomes in total. Using stringent  
82 controls to guard against sequencing errors, we detected a few (0-3 per patient) within-patient  
83 intra-host single nucleotide variants (iSNVs), and a greater number of gene content variants (gene  
84 gain/loss events within patients) (Levade et al. 2017). This variation may affect adaptation to the  
85 host environment, either by resistance to phage predation (Seed et al. 2014) or by impacting  
86 biofilm formation (Levade et al. 2017), but it is not known how within-patient diversity affects  
87 disease severity.

88         Several pathogens are known to evolve within human hosts (Didelot et al. 2016), and  
89 hypermutation has been observed in some cases (Jolivet-Gougeon et al. 2011; Lieberman et al.  
90 2013; Marvig et al. 2013). Hypermutation is a phenotype whereby a strain loses the function of  
91 its mismatch repair machinery and thus becomes a hypermutator. While these hypermutators may  
92 quickly acquire adaptive mutations, they also bear a burden of deleterious mutations (Giraud et  
93 al. 2001). For the population to survive the burden of deleterious mutations, hypermutators may  
94 revert to a non-mutator state, or may recombine their adaptive alleles into the genomes of non-  
95 mutators in the population (Denamur et al. 2000; Jolivet-Gougeon et al. 2011). The hypermutator  
96 phenotype has been observed in vibrios in the aquatic environment (Chu et al. 2017), and induced  
97 in *V. cholerae* in an experimental setting (Wang et al. 2018), but not clearly documented within  
98 infected patients. There is some evidence for hypermutation in *V. cholerae* clinical strains  
99 isolated between 1961 and 1965 (Didelot et al. 2015); however, the authors recognized that these  
100 hypermutators could also have emerged during long-term culture (Eisenstark 2010). It therefore  
101 remains unclear if hypermutators readily emerge within cholera patients, nor their consequences  
102 for disease outcomes and transmission.

103           When within-patient pathogen populations are studied with culture-based methods, their  
104   diversity may be underestimated because the culture process can select isolates more suited to  
105   growth in culture, and due to undersampling of rare variants. In this study, we used a combination  
106   of culture-free metagenomics and WGS of cultured isolates to characterize the within-patient  
107   diversity of *V. cholerae* in individuals with different clinical syndromes ranging from  
108   symptomatic to asymptomatic infection. We found that previous culture-based analyses likely  
109   underestimated the true variation within infected hosts. However, asymptomatic persons yielded  
110   too few metagenomic reads to assess within-patient variation, and this could only be accessed  
111   using cultured *V. cholerae* isolates. Using this culture-based approach to compare symptomatic to  
112   asymptomatic contacts from three households, we found similar levels of within-patient diversity  
113   regardless of disease severity. Using both approaches, we also describe the presence of  
114   hypermutator *V. cholerae* within both symptomatic and asymptomatic infected patients. These  
115   hypermutators are characterized by a high mutation rate, and accumulation of an excess of likely  
116   neutral or deleterious mutations in the genome. Finally, we provide evidence of adaptive  
117   mutations occurring during non-mutator *V. cholerae* infections.  
118

119 **RESULTS**

120

121 **Taxonomic analyses of metagenomics sequences from *Vibrio cholerae* infected index cases**  
122 **and household contacts.**

123 To evaluate the level of within-patient diversity of *Vibrio cholerae* populations infecting  
124 symptomatic and asymptomatic patients in a cohort in Dhaka, Bangladesh, we used both culture-  
125 based whole genome sequencing and culture-free shotgun metagenomic approaches (Fig. 1). We  
126 performed metagenomic sequencing of 22 samples from 21 index cases and 11 samples from 10  
127 household contacts infected with *Vibrio cholerae*, of which two remained asymptomatic during  
128 the follow-up period (Table S1). After removal of reads mapping to the human genome, we used  
129 Kraken2 and MIDAS to taxonomically classify the remaining reads and identify samples with  
130 enough *Vibrio cholerae* reads to reconstruct genomes. Among symptomatic patients (index cases  
131 and household contacts), 15 samples from 14 patients contained enough reads to reconstruct the  
132 *Vibrio cholerae* genome with a mean coverage > 5X. Neither of the two asymptomatic patients  
133 had enough *Vibrio cholerae* reads in their metagenomic sequences to reconstruct genomes by  
134 mapping or *de novo* assembly (mean coverage <0.05X). We also detected reads from two *Vibrio*  
135 phages (ICP1 and ICP3) in some of these samples (Table S1).

136

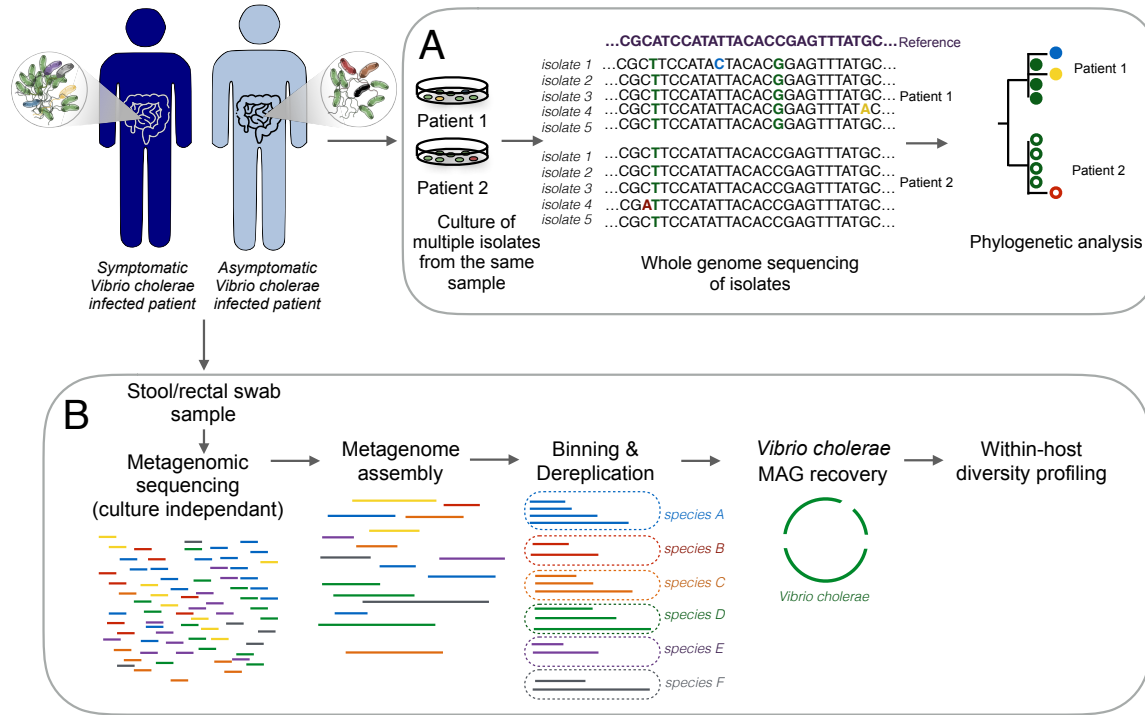

137  
 138 **Figure 1. Summary of the culture-dependent and the culture-free metagenomics workflows for the**  
 139 **characterization of the *Vibrio cholerae* within-patient diversity.** Stool or rectal swab samples were  
 140 collected from symptomatic and asymptomatic *Vibrio cholerae* infected individuals and processed using  
 141 two different approaches: (A) Culture, DNA extraction and whole genome sequencing of multiple isolates  
 142 per patient; (B) Genome-resolved metagenomics involves DNA extraction directly from a microbiome  
 143 sample followed by DNA sequencing, assembly, genome binning and dereplication to generate  
 144 metagenome-assembled genomes (MAGs), and within-host diversity profiling by mapping reads back to  
 145 the MAGs.

146

### 147 **Recovery of high quality *Vibrio cholerae* MAGs from metagenomic samples**

148

149 To reconstruct *Vibrio cholerae* metagenomic assembled genomes (MAGs) from the 11  
 150 samples with coverage > 10X, we *de novo* assembled each sample individually except for patient



151 E, for whom we co-assembled two samples from two consecutive sampling days. High quality  
152 MAGs identified as *Vibrio cholerae* were obtained from each assembly, with no redundancy, and  
153 completeness ranging from 91 to 100% (Table S2). We dereplicated the set of bins and removed  
154 all but the highest quality genome from each redundant set, identifying the bin from patient J as  
155 the best quality MAG overall.

156

### 157 ***Vibrio cholerae* within patient nucleotide diversity estimated from metagenomic data**

158 All metagenomes with *Vibrio cholerae* mean coverage >5X were mapped against the  
159 dereplicated genome set, and we assessed within-patient genetic diversity using inStrain (Olm et  
160 al. 2020). We identified both single nucleotide polymorphisms (SNPs) that varied between  
161 patients (Table S3), and intra patient single nucleotide variants (iSNVs) that varied within  
162 patients (Table S4). We found a total of 39 SNPs between patients, and a range of two to 207  
163 iSNVs within each sample (Table 1, Fig. 2). Given the wide variation in coverage across samples,  
164 we checked for any bias toward detecting iSNVs in high-coverage samples. We observed no  
165 correlation between the number of detected iSNVs and coverage values ( $\rho = -0.12$ ,  $P > 0.05$ ,  
166 Pearson correlation), suggesting no coverage bias, and that diversity levels are comparable across  
167 samples.

168

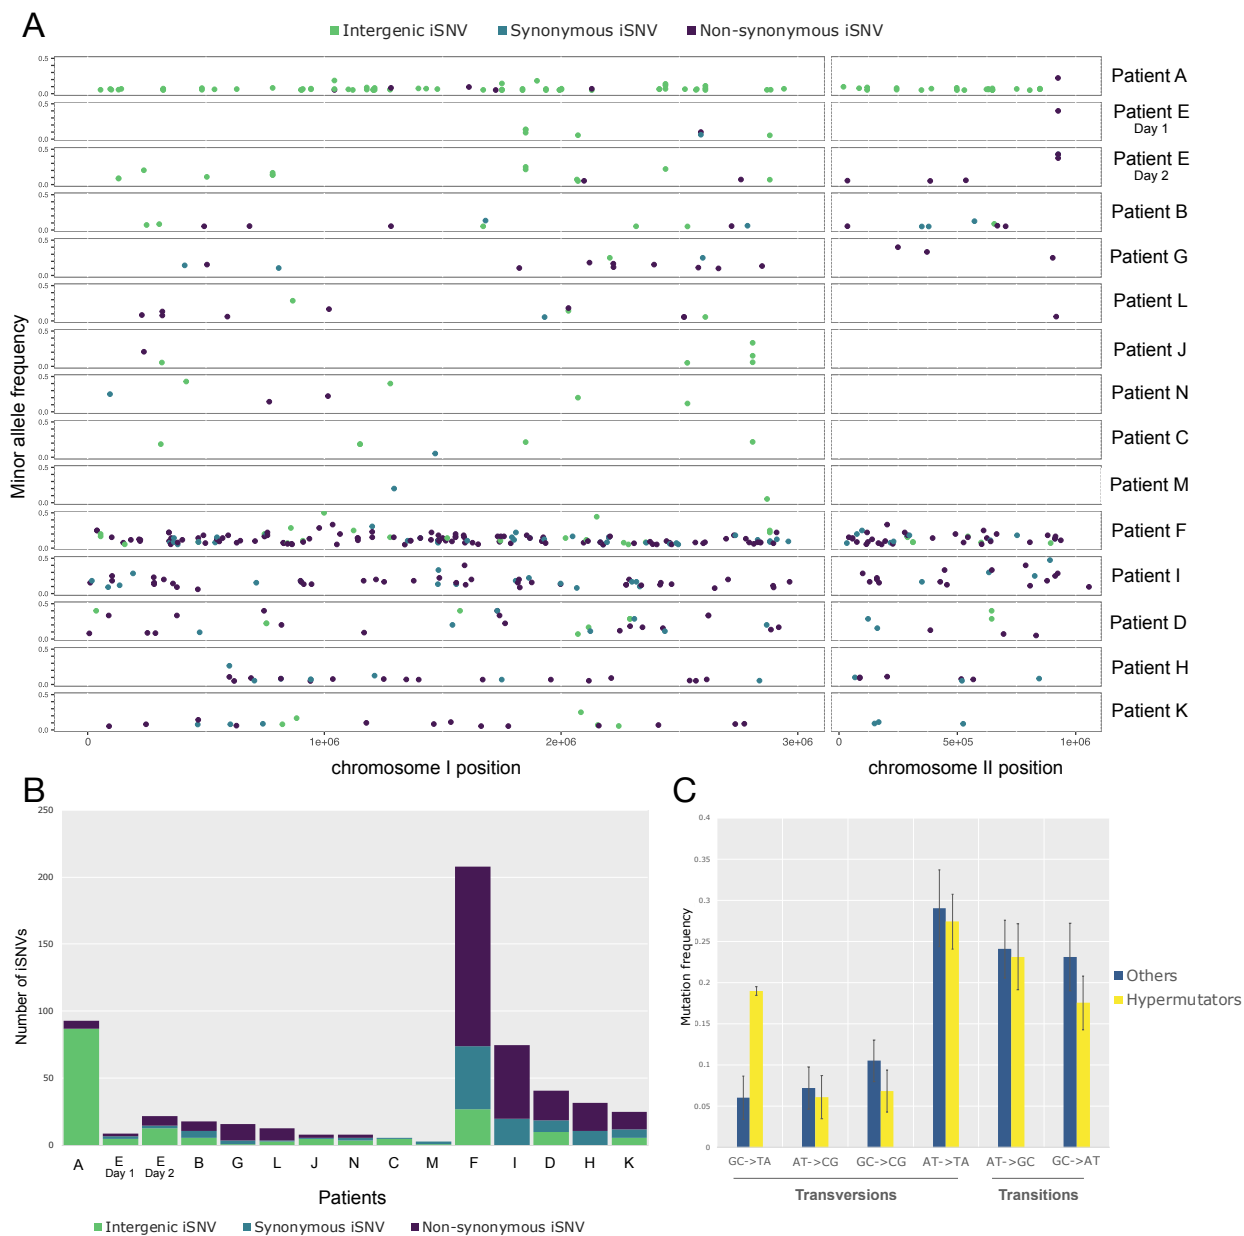

169  
 170 **Figure 2. Within-patient *Vibrio cholerae* diversity quantified from metagenomic data.** (A) Minor  
 171 allele frequency and distribution of intergenic, synonymous and non-synonymous iSNVs across the two  
 172 *Vibrio cholerae* chromosomes for 14 patients with over 5X coverage of the *V. cholerae* genome. (B)  
 173 Numbers of intergenic, synonymous and non-synonymous iSNVs for each patient. (C) Spectrum of  
 174 within-patient mutation in hypermutators compared to non-mutators. Error bars represent standard error of

175 the mean across the group of hypermutators or non-mutators. Only samples with 6 or more iSNVs were  
176 included to reduce noise from low counts.

177  
178 Several mechanisms could account for the origins of the observed iSNVs, including *de novo*  
179 mutation within a patient, co-infection by divergent *V. cholerae* strains, or homologous  
180 recombination. Most iSNVs had low-frequency minor alleles (Fig S1), consistent with recent  
181 mutations occurring within individual patients, rather than co-infection by a roughly equal  
182 mixture of distantly related strains. No iSNVs were observed at the exact same nucleotide  
183 position in different patients, suggesting that iSNVs rarely spread by homologous recombination,  
184 and are never precisely recurrent in our dataset. In patient E, sampled on two consecutive days,  
185 we detected eight iSNVs on the first day, of which four were again detected on the second day,  
186 along with 13 additional iSNVs. This suggests that iSNV allele frequencies can fluctuate  
187 significantly over time. Moreover, iSNVs were distributed across the genome (Fig. 2A), rather  
188 than clustered in hotspots, which would be expected if iSNVs arose from recombination events  
189 (Croucher et al. 2011). Although we cannot strictly exclude co-infection or recombination events  
190 as sources of diversity, most of the observed iSNVs are consistent with *de novo* mutation within  
191 patients.

192

### 193 **Evidence for *V. cholerae* hypermutators within patients**

194 In 5 of the 6 patients with a high number of iSNVs (>25), we identified non-synonymous  
195 (NS) mutations in genes involved in DNA mismatch repair pathways, including the DNA  
196 polymerase II in patient D, or proteins of the methyl-directed mismatch repair (MMR) system in  
197 patient F, I and K (Table 1). These NS variants could explain why these samples seem to have a  
198 higher level of within-host diversity, and suggest the presence of *Vibrio cholerae* with a

199 hypermutator phenotype (Jolivet-Gougeon et al. 2011). In the patient harboring the highest  
200 number of variants (Patient F, 207 iSNVs), we detected two NS mutations in two different genes  
201 coding for proteins involved in DNA repair: the DNA mismatch repair endonuclease MutL  
202 (Jolivet-Gougeon et al. 2011), and the nuclease SbcCD subunit C (Didelot et al. 2015)(Lovett  
203 2011)(Darmon et al. 2007). The patient with the second highest number of iSNVs, patient A,  
204 contained a high number of intergenic variants (87 out of 96 iSNVs, Fig. 2B), but no apparent NS  
205 mutations in genes involved in DNA repair. This large number of intergenic iSNVs are unlikely  
206 due to read mapping errors, since the same iSNV calls were obtained when using the MAG from  
207 patient A as a reference genome. In patient I, where we also detected a high number of iSNVs, a  
208 NS mutation in the gene coding for the MutT/nudix protein, involved in the repair of oxidative  
209 DNA damage (Lu et al. 2001), could also cause a strong hypermutation phenotype. Patient D, H  
210 and K presented fewer iSNVs but also showed NS mutations in genes involved in DNA damage  
211 repair (Foster et al. 1995) (Lee, Sung, et Verdine 2019). However, some of these genes have been  
212 shown to play less critical roles in bacterial DNA repair than MutSLH (Jolivet-Gougeon et al.  
213 2011)(Kunkel et Erie 2005), which could lead to a weaker hypermutator phenotype.

214 Previous studies have noted mutational biases in hypermutators, such as an increase of  
215 transition over transversion mutations in a *Burkholderia dolosa* mutator with a defective MutL  
216 (Lieberman et al. 2013), or an excess of G:C→T:A transversions in a *Bacillus anthracis*  
217 hypermutator (Zeibell et al. 2007), and in members of the gut microbiome (Zhao et al. 2019).  
218 When we compared the spectrum of mutations observed in suspected hypermutators to non-  
219 mutator samples, we found a significance difference (Chi-square test, P<0.01) due to an apparent  
220 excess of G:C→T:A transversions in hypermutators (Fig. 2C).

221 Current theory suggests that hypermutators may be adaptive under novel or stressful  
222 environmental conditions because they more rapidly explore the mutational space and are the first

223 to acquire adaptive mutations. However, hypermutation comes at the cost of the accumulation of  
224 deleterious mutations. To test the hypothesis that hypermutation leads to fitness costs due to these  
225 deleterious mutations, we used iRep (Brown et al. 2016) to estimate *V. cholerae* replication rates  
226 in each sample, and test whether replication rate was negatively associated with the number of  
227 iSNVs. iRep infers replication rates from MAGs and metagenomic reads (Brown et al. 2016). For  
228 instance, an iRep value of 2 would indicate that most of the population is replicating one copy of  
229 its chromosome. In our data (Table 1), iRep values varied from 1.23 (patient E at day 2) to 5.43  
230 (patient D), and we did not find any association between the replication rate of *Vibrio cholerae*  
231 and the number of iSNVs detected within each subject (Fig. S2B, Pearson correlation,  $\rho = 0.15$ ,  $P$   
232  $> 0.05$ ). This suggests that deleterious mutations in hypermutators could be counterbalanced by  
233 adaptive mutations that maintain growth. Alternatively, higher iRep values could be associated  
234 with larger *V. cholerae* population sizes, which could support greater genetic diversity and yield a  
235 positive correlation between iRep values and the number of iSNVs. These hypotheses merit  
236 testing in larger patient cohorts.

237

### 238 **Convergent evolution suggests adaptation of non-mutator *V. cholerae* within patients**

239 While none of the patients shared iSNVs at the exact same nucleotide position, some  
240 contained parallel (or convergent) mutations in the same gene (Table 2). To determine whether  
241 genes that acquired multiple mutations could be under positive selection within the host, we  
242 performed permutation tests for hypermutator and non-mutator samples separately (Methods).  
243 Among the hypermutator samples, we identified five genes with NS mutations in two or more  
244 patients (Table 2), which was not an unexpectedly high level of convergence given the large  
245 number of mutations in hypermutators (permutation test,  $P=0.97$ ). That the  $P$ -value approaches 1

246 suggests either that the hypermutators are actually selected against mutating the same genes in  
247 different patients, or – more likely – that the permutation test is conservative. For the samples  
248 with no evidence of hypermutator phenotypes, we identified two genes with NS mutations in two  
249 patients. The first gene, *hlyA*, encodes a hemolysin that causes cytolysis by forming heptameric  
250 pores in human cell membranes (Olson et Gouaux 2005), while the second gene encodes a  
251 putative ABC transporter ferric-binding protein (Table 2). Observing convergent mutations in  
252 two different genes is unexpected (permutation test,  $P=0.039$ ) in a test that is likely to be  
253 conservative. We also note that the three iSNVs in *hlyA* have relatively high minor allele  
254 frequencies (0.22-0.43) compared to other convergent NS mutations (median minor allele  
255 frequency of 0.11; Table 2) and to NS mutations overall (median of 0.12; Table S4). Together,  
256 these analyses suggest that *V. cholerae* hypermutators produce NS mutations that are  
257 predominantly deleterious or neutral, while evidence for within-patient positive selection on  
258 certain genes in non-mutators merits further investigation.

259 To further explore differential selection at the protein level within and between patients,  
260 we applied the McDonald-Kreitman test (McDonald et Kreitman 1991) to the 9 patients with no  
261 evidence for hypermutation, and to the five patients harboring potential hypermutators. Based on  
262 whole-genome sequences of *V. cholerae* isolates, we previously found an excess of NS mutations  
263 fixed between patients in Bangladesh, based on a small sample of five patients (Levade et al.  
264 2017). Here, based on metagenomes from a larger number of patients, we found the opposite  
265 pattern of a slight excess of NS mutations segregating as iSNVs within patients, consistent with  
266 slightly deleterious mutations occurring within patients and purged over evolutionary time.  
267 However, the difference between NS:S ratios within and between patients was not statistically  
268 significant (Fisher's exact test,  $P>0.05$ ; Table S5); thus, the evidence for differential selective  
269 pressures within versus between cholera patients remains inconclusive.

270 Many NS mutations occurred in genes involved in transmembrane transport,  
271 pathogenesis, response to antibiotics, secretion systems, chemotaxis, and metabolic processes  
272 (Figure S3). Both hypermutator samples (Fig. S3B) and non-mutators (Fig. S3C) have a high  
273 NS:S ratio in genes of unknown function, while hypermutators have many NS mutations in  
274 transmembrane proteins, which are absent in non-mutators. However, non-mutator samples have  
275 more NS mutations in genes involved in pathogenesis and secretion systems. Most of the NS  
276 mutations involved in pathogenesis were found in the gene *hlyA* (a target of convergent  
277 evolution, mentioned above).

278

279 **Whole genome sequencing of *Vibrio cholerae* isolates confirms hypermutator phenotypes**  
280 **and suggests similar diversity levels in symptomatic and asymptomatic patients**

281 In addition to metagenomic analyses, we performed whole genome sequencing of  
282 multiple *Vibrio cholerae* clinical isolates from index cases and asymptomatic contacts (Fig. 1A)  
283 from three households (56, 57, and 58, Table S1). As noted above, asymptomatic infected  
284 contacts did not yield sufficient metagenomic reads to assemble the *V. cholerae* genome or call  
285 iSNVs, but their stool cultures yielded colonies for whole-genome sequencing. The first  
286 asymptomatic contact, 58.01, tested positive for *Vibrio cholerae* on day 4 after the presentation of  
287 the index case to the hospital, and *Vibrio cholerae* was cultured from the stool on days 4, 6, 7 and  
288 8. We sequenced five isolates respectively from day 4 and 6 samples, and four isolates from each  
289 of the subsequent days. For households 56 and 57, five isolates were sequenced from each  
290 sample, at day 1 for the index cases and day 2 for the asymptomatic carriers (Table S6).

291 The index case from household 58 (called 58.00 or patient N) was also included in the  
292 metagenomic analysis described above, allowing a comparison between culture-dependent and -  
293 independent assessments of within-patient diversity. We did not detect any iSNVs in patient

294 58.00, as the five isolates sequenced were isogenic. In contrast, the metagenomic analysis of  
295 patient N revealed seven iSNVs (Table 1), suggesting a higher sensitivity for the detection of rare  
296 variants.

297 In contrast to metagenomes consisting of many unlinked reads, whole-genome sequencing  
298 allows the reconstruction of a phylogeny describing the evolution of *V. cholerae* within and  
299 between patients (Fig. 3). As described previously (Domman et al. 2018), isolates from members  
300 of the same household tended to cluster together. In index case 57.00, four of the isolates were  
301 isogenic, and one isolate was identical to the five isolates sequenced from the asymptomatic  
302 contact from the same household, patient 57.01 (Table 3, Fig. 3). This shared genotype between  
303 the two individuals was unexpected, and could suggest a potential transmission event from the  
304 asymptomatic contact to the index case, followed by a mutational event and the spreading of the  
305 new variant in the index case. The only mutation found in four of the five isolates from the index  
306 case was a non-synonymous mutation in a gene coding for a cyclic-di-GMP-modulating response  
307 regulator, which could have an impact on the regulation of biofilm formation in the host (Tischler  
308 et Camilli 2004). However, the hypothesis that this was a transmission event is only supported by  
309 one mutation, and therefore remains uncertain. Among the other index cases, we found no iSNVs  
310 in patient 58.00 and two iSNVs in patient 56.00. One isolate from this patient had a synonymous  
311 mutation in a hypothetical protein, and another isolate had a non-synonymous mutation in a  
312 UDP-N-acetylglucosamine 4,6-dehydratase gene (Table 3). We detected iSNVs in the other  
313 asymptomatic contacts, with one synonymous and one intergenic mutation in contact 58.02, and  
314 one non-synonymous mutation in one isolate from contact 56.01 (Table 3, Fig. 3).

315



316

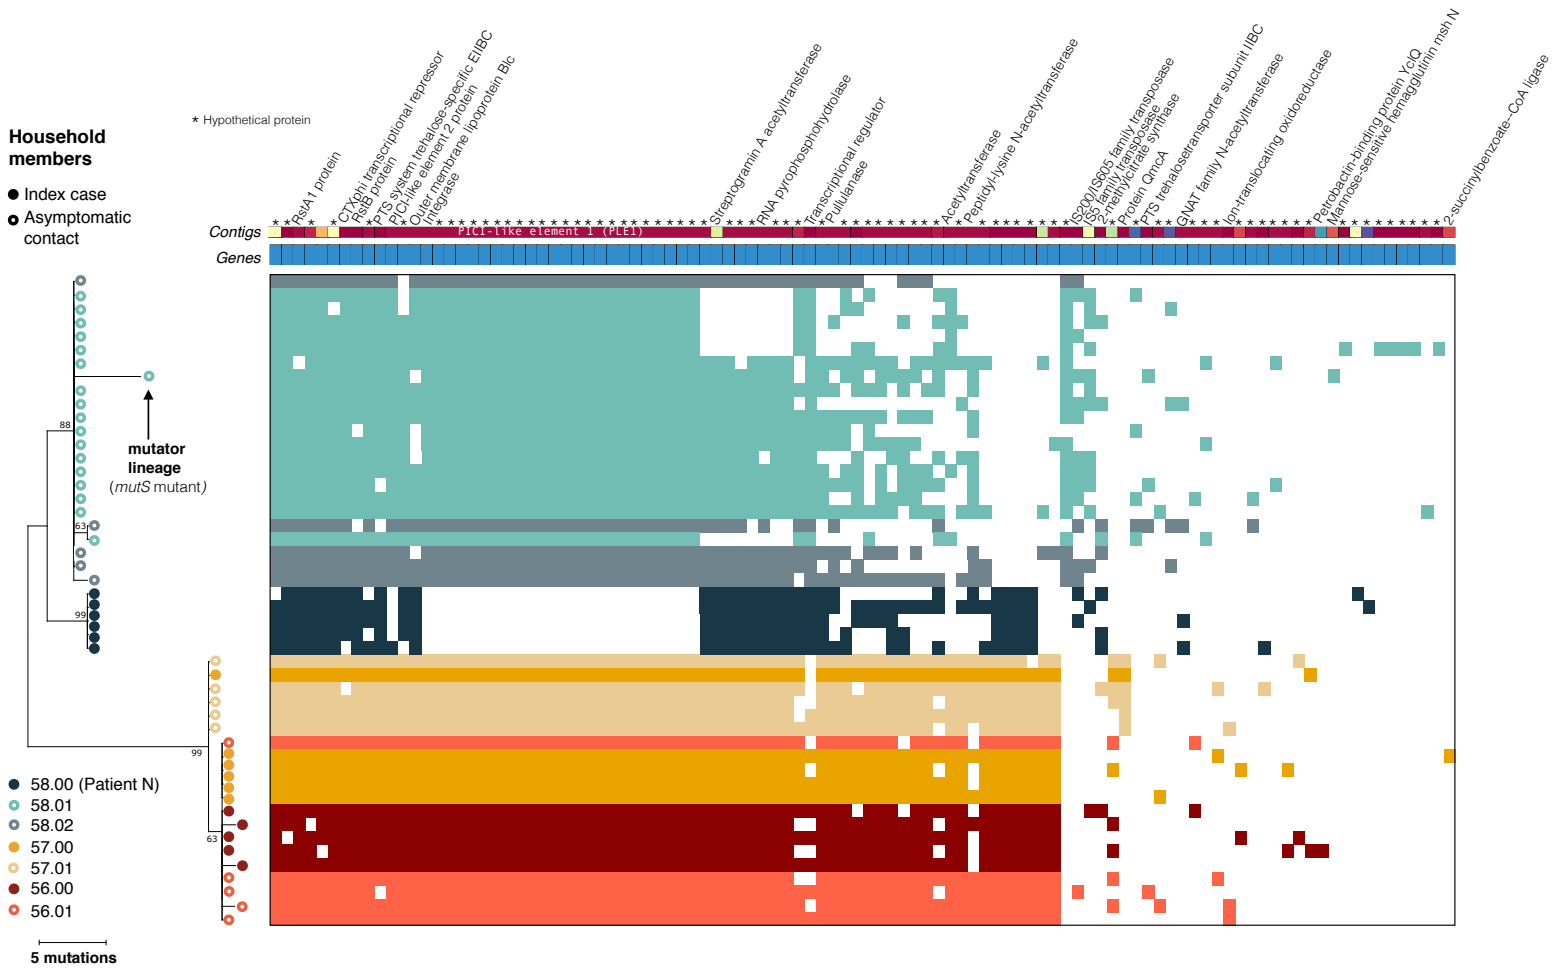

317 **Figure 3. Phylogeny and pan-genome of 48 *Vibrio cholerae* isolates from index cases and their**  
 318 **asymptomatic contacts.** The phylogeny was inferred using Maximum Parsimony. The percentage of  
 319 replicate trees in which the associated taxa clustered together in the bootstrap test (1000 replicates) are  
 320 shown next to the branches. Filled circles represent isolates from index cases and empty circles represent  
 321 isolates from their asymptomatic contacts. The heatmap of gene presence-absence is based on 102 genes  
 322 in the flexible genome. Colored blocks in the heatmap indicate gene presence; white indicates gene  
 323 absence. Each row corresponds to an isolate from the phylogenetic tree and each column represents an  
 324 orthologous gene family. Each unique color represents a different individual.  
 325

326 Notably, we also found evidence for a hypermutator in contact 58.01. One isolate sampled  
327 from this contact had the highest number of mutations seen in any branch in the phylogeny (five  
328 NS mutations) which could be explained by a NS mutation in the gene encoding MutS, another  
329 key component of the methyl-directed mismatch repair (MMR) system (Table 3, Fig. 3). The  
330 mutation in this gene could explain the accumulation of a surprising number of mutations in this  
331 isolate, which is likely a hypermutator. This contact presented no variants in the isolates sampled  
332 at day 4 and 6, but we found this hypermutator isolate on day 7. However, this genotype was not  
333 found at day eight, either due to the lower resolution in the detection of variants with the WGS of  
334 cultured isolates, or the disappearance of this mutant from the population.

335

### 336 **Pan-genome analyses**

337 Whole-genome isolate sequencing also provides the opportunity to study variation in  
338 gene content (the pangenome) within and between patients. We identified a total of 3523 core  
339 genes common to all *V. cholerae* genomes, and 102 flexible genes present in some but not all  
340 genomes (Figure 3; Table S7). We also found an additional 214 genes present uniquely in isolate  
341 56.00C4, assembled into one single contig identified as the genome of the lytic Vibrio phage  
342 ICP1, which was assembled alongside the *Vibrio cholerae* genome. This phage contig contained  
343 the ICP1 CRISPR/Cas system, which consists of two CRISPR loci (designated CR1 and CR2)  
344 and six *cas* genes, as previously described (Seed et al. 2011; 2013). These genes were excluded  
345 from subsequent *V. cholerae* pan genome analyses.

346 Among the 102 flexible genes, some varied in presence/absence within a patient, ranging  
347 from twelve to 53 genes gained or lost per patient (Table S7; Fig. 3). The majority of these  
348 flexible genes (78%) were annotated as hypothetical, and several were transposases or prophage  
349 genes. One gene known to be critical for streptogramin antibiotic resistance, a streptogramin A

350 acetyltransferase, was absent in five isolates from contact 58.01 (Alcala et al. 2020). A large  
351 deletion of 24 genes was detected in patient 58.00, in an 18kb phage-inducible chromosomal  
352 island (PICI) previously shown to prevent phage reproduction, and which is targeted by the ICP1  
353 CRISPR/Cas system (Seed et al. 2013). These PICI-like elements are induced during phage  
354 infection, and interfere with phage reproduction via multiple mechanisms (Ram et al. 2012;  
355 O'Hara et al. 2017). The deletion of this PICI element in the *V. cholerae* genome may be a  
356 consequence of an ongoing evolutionary arms race between *V. cholerae* and its phages.

357

## 358 DISCUSSION

359 Although within-patient *Vibrio cholerae* genetic diversity has been reported previously  
360 (Seed et al. 2012; 2014; Kendall et al. 2010; Levade et al. 2017), our results confirmed that  
361 within-patient diversity is a common feature observed in both symptomatic patients with cholera  
362 but also in asymptomatically infected individuals. In this study, we used a combination of  
363 metagenomic and WGS sequencing technologies to characterize this within-patient diversity,  
364 revealing evidence for hypermutator phenotypes in both symptomatic and asymptomatic  
365 infections.

366 We showed that metagenomics has a higher sensitivity to detect rare genetic variants in  
367 the within-patient *Vibrio cholerae* population. In our previous study, we detected between zero  
368 and three iSNVs in cultured isolates from patients with acute infection (Levade et al. 2017). In  
369 contrast, metagenomic analyses allowed us to detect two iSNVs in the patient with the lowest  
370 level of diversity, but up to 207 iSNVs in another individual (Table 1). In the only patient for  
371 which we were able to characterize *Vibrio cholerae* intra-host diversity both from the  
372 metagenome and from cultured isolates, we did not identify any iSNVs in the isolates, but  
373 detected 7 iSNVs from the metagenomic analyses, even with a coverage <10X. These results

374 highlight one of the potential limitations of the colony sequencing-based approach for the study  
375 of within-host diversity: the difficulty of recovering rare members of the population (Brenzinger  
376 et al. 2019).

377 Despite better sensitivity to detect rare variants, metagenomics has limitations. Within-  
378 sample diversity profiles cannot be established for low-abundance microbes with insufficient  
379 sequence coverage (< 5X) and depth, and this level of coverage is difficult to obtain in diverse  
380 microbial communities. In this study, only 48% of the samples from patients with acute  
381 symptoms, known to harbor a high fraction of vibrios in their stool ( $10^{10}$ - $10^{12}$  vibrios per liter of  
382 stool), contained enough reads to reconstruct *Vibrio cholerae* MAGs and to quantify within-  
383 patient diversity. Asymptomatic patients typically shed even less *V. cholerae* in their stool  
384 (Nelson et al. 2009), making it even more challenging to assemble their genomes using  
385 metagenomics without depletion of host DNA or targeted sequence capture techniques  
386 (Bachmann et al. 2018; Vezzulli et al. 2017).

387 Hypermutation has been defined as an excess of mutations due to deficiency in DNA  
388 mismatch repair, and hypermutator strains have been described in diverse pathogenic infections  
389 and *in vivo* experiments, including *Pseudomonas aeruginosa*, *Haemophilus influenzae* and  
390 *Streptococcus pneumoniae* in cystic fibrosis patients, or *E. coli* in diverse habitats (Jolivet-  
391 Gougeon et al. 2011; Oliver et Mena 2010; Labat et al. 2005). In *Vibrio cholerae*, a previous  
392 study of 260 clinical isolate genomes identified 17 isolates with an unusually high number of  
393 SNPs uniformly distributed along the genome (Didelot et al. 2015). Most of these genomes  
394 contained mutations in one or more of four genes (*mutS*, *mutH*, *mutL* and *uvrD*) that play key  
395 roles in DNA mismatch repair (Didelot et al. 2015). These authors cautiously suggested that this  
396 apparent high frequency of hypermutators could be associated with the rapid spread of the  
397 seventh cholera pandemic, particularly because hypermutators may be a sign of population

398 bottlenecks and recent selective pressure. However, they also hypothesized that these high  
399 mutation rates could be artefactual because the *V. cholerae* isolates had been maintained in stab  
400 cultures for many years. It thus remains unclear if a hypermutator phenotype was derived within  
401 patients or during culture (Didelot et al. 2015; Eisenstark 2010). Using our metagenomic  
402 approach, we showed that hypermutators can indeed emerge during infection. Using culture-  
403 based whole genome sequencing, using only a brief overnight culture, we confirmed that  
404 hypermutators occur in asymptomatic patients as well. Future work will be required to determine  
405 any impacts of hypermutation on cholera disease severity or transmission.

406         Hypermutator phenotypes are believed to be advantageous for the colonization of new  
407 environments or hosts, allowing the hypermutator bacteria to generate adaptive mutations more  
408 quickly, which leads to the more efficient exploitation of resources or increased resistance to  
409 environmental stressful conditions, such as antibiotics (Jolivet-Gougeon et al. 2011; Oliver et  
410 Mena 2010; Labat et al. 2005; Giraud et al. 2001). However, this high mutation rate can have a  
411 negative impact on fitness in the long term, with most of the mutations being neutral or  
412 deleterious (Funchain et al. 2000; Giraud et al. 2001; Chu et al. 2017). A mouse model study  
413 showed that hypermutation can be an adaptive strategy for *V. cholerae* to resist host-produced  
414 reactive oxygen induced stress, and lead to a colonization advantage by increased catalase  
415 production and increased biofilm formation (Wang et al. 2018). In our study of convergent  
416 evolution, we found no evidence for adaptive mutations in the hypermutators. This could be  
417 because the signal from a small number of adaptive mutations are obscured by overwhelming  
418 noise from a large number of neutral or deleterious mutations. Further work is therefore needed  
419 to determine if *V. cholerae* mutators produce adaptive mutations during human infection.

420         In contrast, we did find evidence for an excess of convergent mutations occurring  
421 independently in the same genes in different patients, suggesting parallel adaptation in non-

422 mutator *V. cholerae* infections. Specifically, two patients contained mutations in the same  
423 hemolysin gene, *hlyA*, which codes for a toxin that has both vacuolating and cytotoxic activities  
424 against a number of cell lines, including human intestinal cells (Tsou et Zhu 2010), and is known  
425 to be an important virulence factor in *Vibrio cholerae* El Tor O1 and a major target of immune  
426 responses during acute infection (Olivier et al. 2007; Weil, Arifuzzaman, et al. 2009). Previous  
427 studies of within-patient *V. cholerae* evolution did not identify mutations in *hlyA*, and instead  
428 identified different mutations possibly under selection for biofilm formation (Levade et al. 2017)  
429 or phage resistance phenotypes (Seed et al. 2014). This lack of concordance could be explained  
430 by relatively modest sample sizes of cholera patients in these studies but could also suggest that  
431 selective pressures may be idiosyncratic and person-specific across *Vibrio cholerae* infections.

432 In conclusion, our results illustrate the potential and limitations of metagenomics as a  
433 culture-independent approach for the characterization of within-host pathogen diversity, and that  
434 this diversity is likely to be underestimated by traditional culture-based techniques. We also  
435 provide evidence that hypermutators emerge within human *V. cholerae* infection, and their  
436 evolutionary dynamics and relevance to disease progression merits further study.

437

438

## 439 MATERIALS AND METHODS

### 440 Sample collection, clinical outcomes and metagenomic sequencing

441 To study within-host diversity of *V. cholerae* during infection, we used stool and rectal  
442 swab samples collected from cholera patients admitted to the icddr,b (International Center for  
443 Diarrheal Disease Research, Bangladesh) Dhaka Hospital, and from their household contacts, as  
444 previously described (Midani et al. 2018). Index cases were defined as patients presenting to the  
445 hospital with severe acute diarrhea and a stool culture positive for *V. cholerae*. Individuals who  
446 shared the same cooking pot with an index patient for three or more days are considered  
447 household contacts and were enrolled within 6 hours of the presentation of the index patient to  
448 the hospital. Rectal swabs were collected each day during a ten-day follow up period after  
449 presentation of the index case. Household contacts underwent daily clinical assessment of  
450 symptoms and collection of blood for serological testing. Contacts were determined to be  
451 infected if any rectal swab culture was positive for *V. cholerae* or if the contact developed  
452 diarrhea and a 4-fold increase in vibriocidal titer during the follow-up period (Harris et al. 2008;  
453 Weil, Khan, et al. 2009). If they developed watery diarrhea during the follow up period, contacts  
454 with positive rectal swabs were categorized as symptomatic and those without diarrhea were  
455 considered asymptomatic. We excluded patients with age below two and above 60 years old, or  
456 with major comorbid conditions (Harris et al. 2008; Weil et al. 2009).

457  
458 Fecal samples and rectal swabs from the day of infection and follow up timepoints were  
459 collected and immediately placed on ice after collection and stored at -80°C until DNA  
460 extraction. DNA extraction was performed with the PowerSoil DNA extraction kits (Qiagen)  
461 after pre-heating to 65°C for 10 min and to 95°C for 10 min. Sequencing libraries were  
462 constructed for 33 samples from 31 patients, for which we obtained enough DNA. We used the

463 NEBNext Ultra II DNA library prep kit and sequenced the libraries on the Illumina HiSeq 2500  
464 (paired-end 125 bp) and the Illumina NovaSeq 6000 S4 (paired-end 150 bp) platforms at the  
465 Genome Québec sequencing platform (McGill University).

466

## 467 **Metagenomic analyses**

### 468 *Sequence preprocessing and assembly*

469 Sequencing fastq files were quality checked with FastQC  
470 (<https://www.bioinformatics.babraham.ac.uk/projects/fastqc/>). We removed human and technical  
471 contaminant DNA by aligning reads to the PhiX genome and the human genome (hg19) with  
472 Bowtie2 (Langmead et Salzberg 2012) , and used the iu-filter-quality-minoche script of the  
473 illumina-utils program with default parameters to filter the reads (Eren et al. 2013).

474

### 475 *Taxonomic assignment*

476 Processed paired-end metagenomics sequences were classified using two taxonomic  
477 profilers: Kraken2 v.2.0.8\_beta (a k-mer matching algorithm) (Wood, Lu, et Langmead 2019)  
478 and MIDAS v.1.3.0 (a read mapping algorithm) (Nayfach et al. 2016). Kraken 2 examines the k-  
479 mers within a query sequence and uses the information within those k-mers to query a database,  
480 then maps k-mers to the lowest common ancestor (LCA) of all genomes known to contain a  
481 given k-mer. Kraken2 was run against a reference database containing all RefSeq viral, bacterial  
482 and archaeal genomes (built in May 2019), with default parameters. MIDAS uses a panel of 15  
483 single-copy marker genes present in all of ~31,000 bacterial species included in its database to  
484 perform taxonomic classification, and maps metagenomic reads to this database to estimate the  
485 read depth and relative abundance of 5,952 bacterial species. We identified metagenomic samples



486 containing *V. cholerae* and vibriophage reads, and computed the mean coverage (number of reads  
487 per base-pair) of the *V. cholerae* pangenome in the MIDAS database (Table 1).

488

### 489 ***Assembly and binning of Vibrio cholerae genomes***

490 To recover good quality metagenome-assembled genomes (MAGs) of *V. cholerae*, we  
491 selected metagenomic samples with coverage >10X against the *V. cholerae* pangenome in the  
492 MIDAS database, and used MEGAHIT v.1.2.9 (Li et al. 2016) to perform *de novo* assembly. For  
493 9 of the 11 selected samples, we independently assembled the genome of each sample, and co-  
494 assembled the two remaining samples, which belong to the same patient (a symptomatic infected  
495 contact on days 9 and 10). Contigs of <1.5 kb were discarded.

496 We extracted MAGs by binning of our metagenomic assemblies. Because no single  
497 binning approach is superior in every case, with performance of the algorithms varying across  
498 samples, we used different binning tools to recover MAGs. The quality of a metagenomic bin is  
499 evaluated by its completeness (the level of coverage of a population genome), and the  
500 contamination level (the amount of sequence that does not belong to this population from another  
501 genome). These metrics can be estimated by counting the frequency of single-copy marker genes  
502 within each bin (Parks et al. 2015). We inferred bins using CONCOCT v.1.1.0 (Alneberg et al.  
503 2014), MaxBin 2 v.2.2.7 (Wu, Simmons, et Singer 2016) and MetaBAT 2 v.2.12.1 (Kang et al.  
504 2019), with default parameters. We then used DAS\_Tool v.1.1.1 on the results of these three  
505 methods, to select a single set of non-redundant, high-quality bins per sample (Sieber et al. 2018).  
506 DAS\_Tool is a bin consolidation tool, which predicts single-copy genes in all the provided bin  
507 sets, aggregates bins from the different binning predictions, and extracts a more complete  
508 consensus bin from each aggregate such that the resulting bin has the most single-copy genes  
509 while having a reasonably low number of duplicate genes (Sieber et al. 2018). We then used

510 Anvi'o v.6.1 (Eren et al. 2015) to manually refine the bins with contamination higher than 10%  
511 and Centrifuge v.1.0.4\_beta (Kim et al. 2016) to determine the taxonomy of all bins in each  
512 sample, in order to identified *V. cholerae* MAGs.

513 Bins with completeness > 60% and contamination <10% were first selected, and those  
514 assigned to *V. cholerae* were further filtered (completeness > 90% and contamination <1% for  
515 the *V. cholerae* bins). We dereplicated the entire set of bins with dRep v.2.2.3 using a minimum  
516 completeness of 60%, the ANImf algorithm, 99% secondary clustering threshold, maximum  
517 contamination of 10%, and 25% minimum coverage overlap, and obtained 79 MAGs displaying  
518 the best quality and representing individual metagenomic species (MGS).

519

#### 520 ***Detection of Vibrio cholerae genetic diversity within and between metagenomic samples***

521 We created a bowtie2 index of the 79 representative genomes from the dereplicated set,  
522 including a single high-quality *Vibrio cholerae* MAG, and mapped reads from each sample to this  
523 set. By including many diverse microbial genomes in the bowtie2 index, we aimed to avoid the  
524 mismapping of reads from other species to the *V. cholerae* genome, and to reduce potential false  
525 positive intra-host single nucleotide variant (iSNV) calls. We mapped the metagenomics reads of  
526 each sample with a *V. cholerae* coverage value >5X (obtained with MIDAS) against the set of 79  
527 MAGs, using Bowtie2 (Langmead et Salzberg 2012) with the --very-sensitive parameters. We  
528 also used Prodigal (Hyatt et al. 2010) on the concatenated MAGs, in order to predict open  
529 reading frames using default metagenomic settings.

530 We then used inStrain on the 15 selected samples  
531 (<https://instrain.readthedocs.io/en/latest/index.html>). This program aims to identify and compare  
532 the genetic heterogeneity of microbial populations within and between metagenomic samples  
533 (Olm et al. 2020). "InStrain profile" was run on the mapping results, with the minimum percent

534 identity of read pairs to consensus set to 99%, minimum coverage to call a variant of 5X, and  
535 minimum allele frequency to confirm a SNV equal to 0.05. All non-paired reads were filtered  
536 out, as well as reads with an identity value below 0.99. Coverage and breadth of coverage  
537 (percentage of reference base pairs covered by at least one read) were computed for each  
538 genome. InStrain identified both biallelic and multiallelic SNV frequencies at positions where  
539 phred30 quality filtered reads differ from the reference genome and at positions where multiple  
540 bases were simultaneously detected at levels above the expected sequencing error rate. SNVs  
541 were classified as non-synonymous, synonymous, or intergenic based on gene annotations, and  
542 gene functions were recovered from the Uniprot database (The UniProt Consortium 2019) and  
543 BLAST (Madden 2003). Then, similar filters to those described in (Garud et al. 2019) were  
544 applied to the detected SNVs. We excluded from the analysis positions with very low or high  
545 coverage value  $D$  compared to the median coverage  $\bar{D}$ , and positions within 100 bp of contig  
546 extremities. As sites with very low coverage could result from a bias in sequencing or library  
547 preparation, and sites with higher coverage could arise from mapping error or be the result of  
548 repetitive region or multi-copy genes not well assembled, we masked sites in all the samples if  $D$   
549 was  $< 0.3\bar{D}$  and if  $D$  was  $> 3\bar{D}$  in at least two samples.

550

### 551 ***Mutation spectrum of hypermutator and non-mutator samples***

552 For each sample, iSNVs were categorized into six mutation types based on the chemical  
553 nature of the nucleotide changes (transitions or transversions). We combined all the samples with  
554 hypermutators and compared them to the mutation spectrum of the non-mutators. The mutation  
555 spectrum was significantly different between the hypermutator samples and the non-  
556 hypermutator samples (Chi-squared test,  $P < 0.01$ ). We then computed the mutation mean and  
557 standard error of each of the six mutation types and compared the two groups (Figure 2C).

558

### 559 ***Bacterial replication rate estimation***

560 Replication rates were estimated with the metric iRep (index of replication), which is  
561 based on the measurement of the rate of the decrease in average sequence coverage from the  
562 origin to the terminus of replication. iRep values (Brown et al. 2016) were calculated by mapping  
563 the sequencing reads of each sample to the *V. cholerae* MAG assembled from that sample.

564

### 565 ***Tests for natural selection***

566 First, we identified signals of convergent evolution in the form of nonsynonymous iSNVs  
567 occurring independently in the same gene in multiple patients. To assess the significance of  
568 convergent mutations, we compared their observed frequencies to expected frequencies in a  
569 simple permutations model. We ran separate permutations for non-mutators (two genes with  
570 convergent mutations in at least two out of eight non-mutator samples, including only one time  
571 point from the patient sampled twice, and excluding the outlier patient A with a large number of  
572 intergenic iSNVs) and possible hypermutators (five genes with convergent mutations in at least  
573 two out of five possible hypermutator samples). In each permutation, we randomized the  
574 locations of the nonsynonymous mutations, preserving the observed number of nonsynonymous  
575 mutations in each sample, and the observed distribution of gene lengths. For simplicity, we  
576 assumed that 2/3 of nucleotide sites in coding regions were nonsynonymous. We repeated the  
577 permutations 1000 times and estimated a *P*-value as the fraction of permutations yielding greater  
578 than or equal to the observed number of genes mutated in two or more samples.

579 Second, we compared natural selection at the protein level within versus between patients,  
580 using the McDonald-Kreitman test (McDonald et Kreitman 1991). We again considered  
581 hypermutators separately. Briefly, the four counts ( $P_n$ ,  $P_s$ ,  $D_n$ ,  $D_s$ ) of between-patient divergence

582 (D) vs. within-patient polymorphism (P), and non-synonymous (n) vs synonymous (s) mutations  
583 were computed and tested for neutrality using a Fisher's exact test (FDR corrected  $P$ -  
584 values  $< 0.05$ ).

585

## 586 **Whole genome sequencing analyses**

### 587 ***Culture of Vibrio cholerae isolates***

588 We selected three of the households with asymptomatic infected contacts (households 56,  
589 57, and 58) for within-patient diversity analysis using multiple *V. cholerae* colonies per  
590 individual. Each index case was sampled on the day of presentation to the icddr,b, and  
591 asymptomatic contacts positive for *V. cholerae* were sampled on the following day, except for  
592 one contact (household 58, contact 02). This individual was only positive on day 4 following  
593 presentation of the index case, and we collected samples and cultured isolates from day 4 to day  
594 8. Stool samples collected from three index cases and their respective infected contacts were  
595 streaked onto thiosulfate-citrate-bile salts-sucrose agar (TCBS), a medium selective for *V.*  
596 *cholerae*. After overnight incubation, individual colonies were inoculated into 5 ml Luria-Bertani  
597 broth and grown at 37 °C overnight. For each colony, 1 ml of broth culture was stored at -80 °C  
598 with 30% glycerol until DNA extraction. We used the Qiagen DNeasy Blood and Tissue kit,  
599 using 1.5 ml bacteria grown in LB media, to extract the genomic DNA. In order to obtain pure  
600 gDNA templates, we performed a RNase treatment followed by a purification with the MoBio  
601 PowerClean Pro DNA Clean-Up Kit.

602

### 603 ***Whole genome sequencing and preprocessing***

604 We prepared 48 sequencing libraries using the NEBNext Ultra II DNA library prep kit  
605 (New England Biolabs) and sequenced them on the Illumina HiSeq 2500 (paired-end 125 bp)

606 platform at the Genome Québec sequencing platform (McGill University). Sequencing fastq files  
607 were quality checked with FastQC, and Kraken2 was used to test for potential contamination with  
608 other bacterial species (Wood, Lu, et Langmead 2019).

609

### 610 *Variant calling and phylogeny*

611 We mapped the reads for each sample to the MJ-1236 reference genome and called single  
612 nucleotide polymorphisms (SNPs, fixed within patients) and single nucleotide variants (SNVs,  
613 variable within patients) using Snippy v.4.6.0 (Seemann 2015), with default parameters. A  
614 concatenated alignment of these core variants was generated, and an unrooted phylogenetic tree  
615 was inferred using maximum parsimony (MP) in MEGA X (Stecher, Tamura, et Kumar 2020).  
616 The percentage of replicate trees in which the associated taxa clustered together in the bootstrap  
617 test (1000 replicates) are shown next to the branches. The MP tree was obtained using the  
618 Subtree-Pruning-Regrafting (SPR) algorithm with search level 1 in which the initial trees were  
619 obtained by the random addition of sequences (10 replicates).

620

### 621 *De novo assembly and pan genome analyses*

622 We *de novo* assembled genomes from each isolate using SPAdes v.3.11.1 on the short reads, with  
623 default parameters (Bankevich et al. 2012) and used Prokka v1.5 (Seemann 2014) to annotate  
624 them. We constructed a pan-genome from the resulting annotated assemblies using Roary  
625 v.3.13.0 (Page et al. 2015), identifying genes present in all isolates (core genome) and genes only  
626 present in some isolates (flexible genome). The flexible genome and the phylogenetic tree were  
627 visualized with Phandango v.1.1.0 (Hadfield et al. 2018).

628

629

630

631 **DATA AVAILABILITY**

632

633 All metagenomic sequence data are available in NCBI GenBank under BioProject  
634 PRJNA668607, and isolate genome sequences under BioProject PRJNA668606.

635

636

637 **FUNDING INFORMATION**

638

639 This study was supported by a Canadian Institutes of Health Research Operating Grant to BJS,

640 the icddr,b Centre for Health and Population Research, grants AI103055 (J.B.H and F.Q),

641 AI106878 (E.T.R and F.Q.), AI058935 (E.T.R, S.B.C and F.Q.), T32A1070611976 and

642 K08AI123494 (A.A.W.), and Emerging Global Fellowship Award TW010362 (T.R.B.), from the

643 National Institutes of Health, and the Robert Wood Johnson Foundation Harold Amos Medical

644 Faculty Development Program (R.C.C.).

645

646 **ACKNOWLEDGEMENTS**

647 We are grateful to the people of Dhaka where our study was undertaken; to the field, laboratory

648 and data management staff who provided a tremendous effort to make the study successful; and

649 to the people who provided valuable support in our study. The icddr,b gratefully acknowledges

650 the Government of the People's Republic of Bangladesh; Global Affairs Canada (GAC); Swedish

651 International Development Cooperation Agency (Sida) and the Department for International

652 Development, (UKAid). We declare that we have no competing financial interest.

653

654 **ETHICAL STATEMENT**

655

656 The Ethical and Research Review Committees of the icddr,b and the Institutional Review Board

657 of MGH reviewed the study. All adult subjects provided informed consent and parents/guardians

658 of children provided informed consent. Informed consent was written.

659

660 **CONFLICTS OF INTEREST**

661 The authors declare that there are no conflicts of interest.



## 662 TABLES

| Patient         | Total number of iSNVs | Number of non-synonymous iSNVs | Number of synonymous iSNVs | Number of intergenic iSNVs | Mean coverage | iRep value | DNA repair and proofreading genes with NS mutation                |
|-----------------|-----------------------|--------------------------------|----------------------------|----------------------------|---------------|------------|-------------------------------------------------------------------|
| Patient A       | 93                    | 6                              | 0                          | 87                         | 451.3X        | 3.34       | -                                                                 |
| Patient B       | 18                    | 7                              | 5                          | 6                          | 111.4X        | 1.7        | -                                                                 |
| Patient C       | 6                     | 0                              | 1                          | 5                          | 111.8X        | 1.7        | -                                                                 |
| Patient D       | 41                    | 22                             | 9                          | 10                         | 10X           | 5.43       | DNA polymerase II                                                 |
| Patient E day 1 | 8                     | 2                              | 1                          | 5                          | 351X          | 3.25       | -                                                                 |
| Patient E day 2 | 21                    | 7                              | 1                          | 13                         | 258X          | 1.23       | -                                                                 |
| Patient F       | 207                   | 133                            | 47                         | 27                         | 18.2X         | 2.48       | DNA mismatch repair endonuclease MutL<br>Nuclease SbcCD subunit C |
| Patient G       | 16                    | 12                             | 3                          | 1                          | 7.7X          | 1.73       | -                                                                 |
| Patient H       | 32                    | 21                             | 11                         | 0                          | 98.5X         | 4.75       | Excinuclease ABC subunit UvrB                                     |
| Patient I       | 75                    | 55                             | 20                         | 0                          | 13X           | 2.79       | MutT/nudix family protein                                         |
| Patient J       | 6                     | 1                              | 0                          | 5                          | 424.6X        | 1.84       | -                                                                 |
| Patient K       | 25                    | 13                             | 6                          | 6                          | 18X           | 1.69       | Formamidopyrimidine-DNA glycosylase mutM                          |
| Patient L       | 13                    | 9                              | 1                          | 3                          | 164.4X        | 2.67       | -                                                                 |
| Patient M       | 2                     | 0                              | 1                          | 1                          | 113X          | 2.65       | -                                                                 |
| Patient N       | 7                     | 2                              | 1                          | 3                          | 6.7X          | 2.27       | -                                                                 |

663  
664 **Table 1. Within-patient *Vibrio cholerae* diversity profiles from 15 metagenomes.** Mutations  
665 segregating within patients are denoted iSNVs. The number of iSNVs and mean coverage values  
666 were computed with InStrain (Olm et al. 2020) and replication rate with iRep (Brown et al.  
667 2016).

| Protein                                                        | Patient A    | Patient B    | <u>Patient D</u> | Patient E           | <u>Patient F</u> | <u>Patient H</u> | <u>Patient I</u> | <u>Patient K</u> |
|----------------------------------------------------------------|--------------|--------------|------------------|---------------------|------------------|------------------|------------------|------------------|
| Hemolysin (VC cytolysin)                                       | NS<br>(0.22) | -            | -                | 3 NS<br>(0.22-0.43) | -                | -                | -                | -                |
| 2-aminoethylphosphonate ABC transporter ferric-binding protein | -            | NS<br>(0.05) | -                | NS<br>(0.05)        | -                | -                | -                | -                |
| Peptidase B                                                    | -            | -            | NS<br>(0.33)     | -                   | -                | -                | NS<br>(0.09)     | -                |
| Nuclease SbcCD subunit C                                       | -            | -            | S<br>(0.28)      | -                   | NS<br>(0.09)     | -                | -                | -                |
| C4-dicarboxylate transport sensor protein                      | -            | -            | -                | -                   | NS<br>(0.08)     | -                | NS<br>(0.11)     | -                |
| zinc/cadmium/mercury/lead-transporting ATPase                  | -            | -            | -                | -                   | NS<br>(0.08)     | -                | -                | NS<br>(0.06)     |
| hypothetical protein                                           | -            | -            | -                | -                   | NS<br>(0.14)     | -                | -                | NS<br>(0.14)     |
| hypothetical protein                                           | -            | -            | -                | -                   | NS<br>(0.33)     | NS<br>(0.11)     | -                | -                |
| Formamidopyrimidine-DNA glycosylase mutM                       | -            | -            | -                | -                   | S<br>(0.18)      | -                | -                | NS<br>(0.08)     |
| Phosphoribosylformylglycinamide synthase                       | -            | -            | -                | -                   | -                | -                | NS<br>(0.06)     | S<br>(0.08)      |

668

669 **Table 2. Set of genes with convergent mutations identified in more than one patient.** The  
670 presence of a synonymous or non-synonymous iSNV in each gene and each patient is indicated  
671 with S or NS, respectively, and the minor allele frequency is shown in parentheses. None of the  
672 mutations were found at the same nucleotide or codon position. Patients containing possible or  
673 likely hypermutators are underlined. Only genes and patients containing more than one mutated  
674 gene are shown.

| Type | Isolates                 | Mutation type | Nucleotide position in MJ-1236 | Ref. nucleotide | Alt. nucleotide | Gene annotation                                   | Metagenomic samples with same variant |
|------|--------------------------|---------------|--------------------------------|-----------------|-----------------|---------------------------------------------------|---------------------------------------|
| iSNV | 58.01d7C1                | NS            | Chr1,53054                     | G               | A               | DNA mismatch repair protein MutS                  | -                                     |
| SNP  | Households 56 and 57     | S             | Chr1, 198988                   | G               | A               | MSHA biogenesis protein MshQ                      | -                                     |
| iSNV | 58.01d7C1                | NS            | Chr1, 209665                   | G               | A               | MSHA biogenesis protein MshN                      | -                                     |
| iSNV | 56.00C4                  | NS            | Chr1,374172                    | C               | T               | UDP-N-acetylglucosamine 4,6-dehydratase           | -                                     |
| SNP  | Household 58             | NS            | Chr1,410638                    | G               | A               | Phosphopantetheine adenylyltransferase            | Patients M, N                         |
| SNP  | Households 56 and 57     | NS            | Chr1,754154                    | C               | T               | 1,4-dihydroxy-2-naphthoate polyprenyltransferase  | -                                     |
| SNP  | Household 58             | S             | Chr1,841538                    | C               | T               | SSU ribosomal protein S4p                         | Patients L, M, N                      |
| SNP  | Household 58             | S             | Chr1,1315021                   | T               | G               | Exported zinc metalloprotease YfgC precursor      | Patients L, M, N                      |
| iSNV | 58.02C1                  | S             | Chr1,1576083                   | C               | A               | Periplasmic thiol:disulfide oxidoreductase DsbB   | -                                     |
| SNP  | Patient 58.00            | NS            | Chr1,1689779                   | A               | C               | Sigma-54 dependent transcriptional regulator      | -                                     |
| SNP  | Contacts 58.01 and 58.02 | NS            | Chr1,2301641                   | G               | A               | Putative membrane protein                         | -                                     |
| iSNV | 58.01d7C1                | NS            | Chr1,1744854                   | C               | T               | Hypothetical protein                              | -                                     |
| SNP  | Contacts 58.01 and 58.02 | NS            | Chr1,2262202                   | A               | G               | Serine transporter                                | -                                     |
| SNP  | Households 56 and 57     | NS            | Chr1,2301641                   | C               | T               | LacI family DNA-binding transcriptional regulator | Patients D, J, K                      |
| iSNV | 57.00C5                  | NS            | Chr1,2509468                   | C               | T               | cyclic-di-GMP-modulating response regulator       | -                                     |
| iSNV | 56.01C1                  | NS            | Chr1,2588496                   | C               | T               | Amidophosphoribosyltransferase                    | -                                     |
| iSNV | 58.01d7C1                | NS            | Chr1,2693815                   | C               | T               | PTS system, trehalose-specific IIB component      | -                                     |
| SNP  | Household 58             | NS            | Chr1,2806858                   | A               | T               | Citrate lyase alpha chain                         | Patients L, M, N                      |
| iSNV | 56.00C1                  | S             | Chr1,3037471                   | A               | G               | Hypothetical protein                              | -                                     |
| SNP  | Patient 58.00            | NS            | Chr1,3059131                   | C               | T               | DNA polymerase V (UmuC)                           | -                                     |
| SNP  | Households 56 and 57     | NS            | Chr1,3095039                   | G               | A               | Outer membrane protein OmpU                       | Patients D, F, G, I, J, K             |
| SNP  | Contacts 58.01 and 58.02 | S             | Chr1,3105102                   | C               | T               | Glutamate-1-semialdehyde aminotransferase         | -                                     |
| iSNV | 58.01d7C1                | NS            | Chr1,528409                    | C               | T               | Vibriolysin, extracellular zinc protease          | -                                     |

675 **Table 3. Nucleotide changes identified in core genes of the *V. cholerae* isolates from index**

676 **cases (56.00, 57.00 and 58.00) and their asymptomatic contacts. Genome position is according**

677 to the MJ-1236 reference genome (CP001485.1, CP001486.1). Mutations segregating within  
678 patients are denoted iSNVs; mutations fixed between patients are denoted SNP. Patient allele  
679 frequency shows the allele frequency of the alternative (minor) allele. Ref=Reference allele;  
680 Alt=Alternative allele. NS=non-synonymous; S=synonymous. Chr1=chromosome 1;  
681 Chr2=chromosome  
682

683 **SUPPLEMENTARY FIGURES**

684 **Figure S1. Minor allele frequency distributions for iSNVs in 15 metagenomic samples.**

685 Allele frequencies and mean coverage values (cov) were computed with Instrain (Olm et al.

686 2020)

687

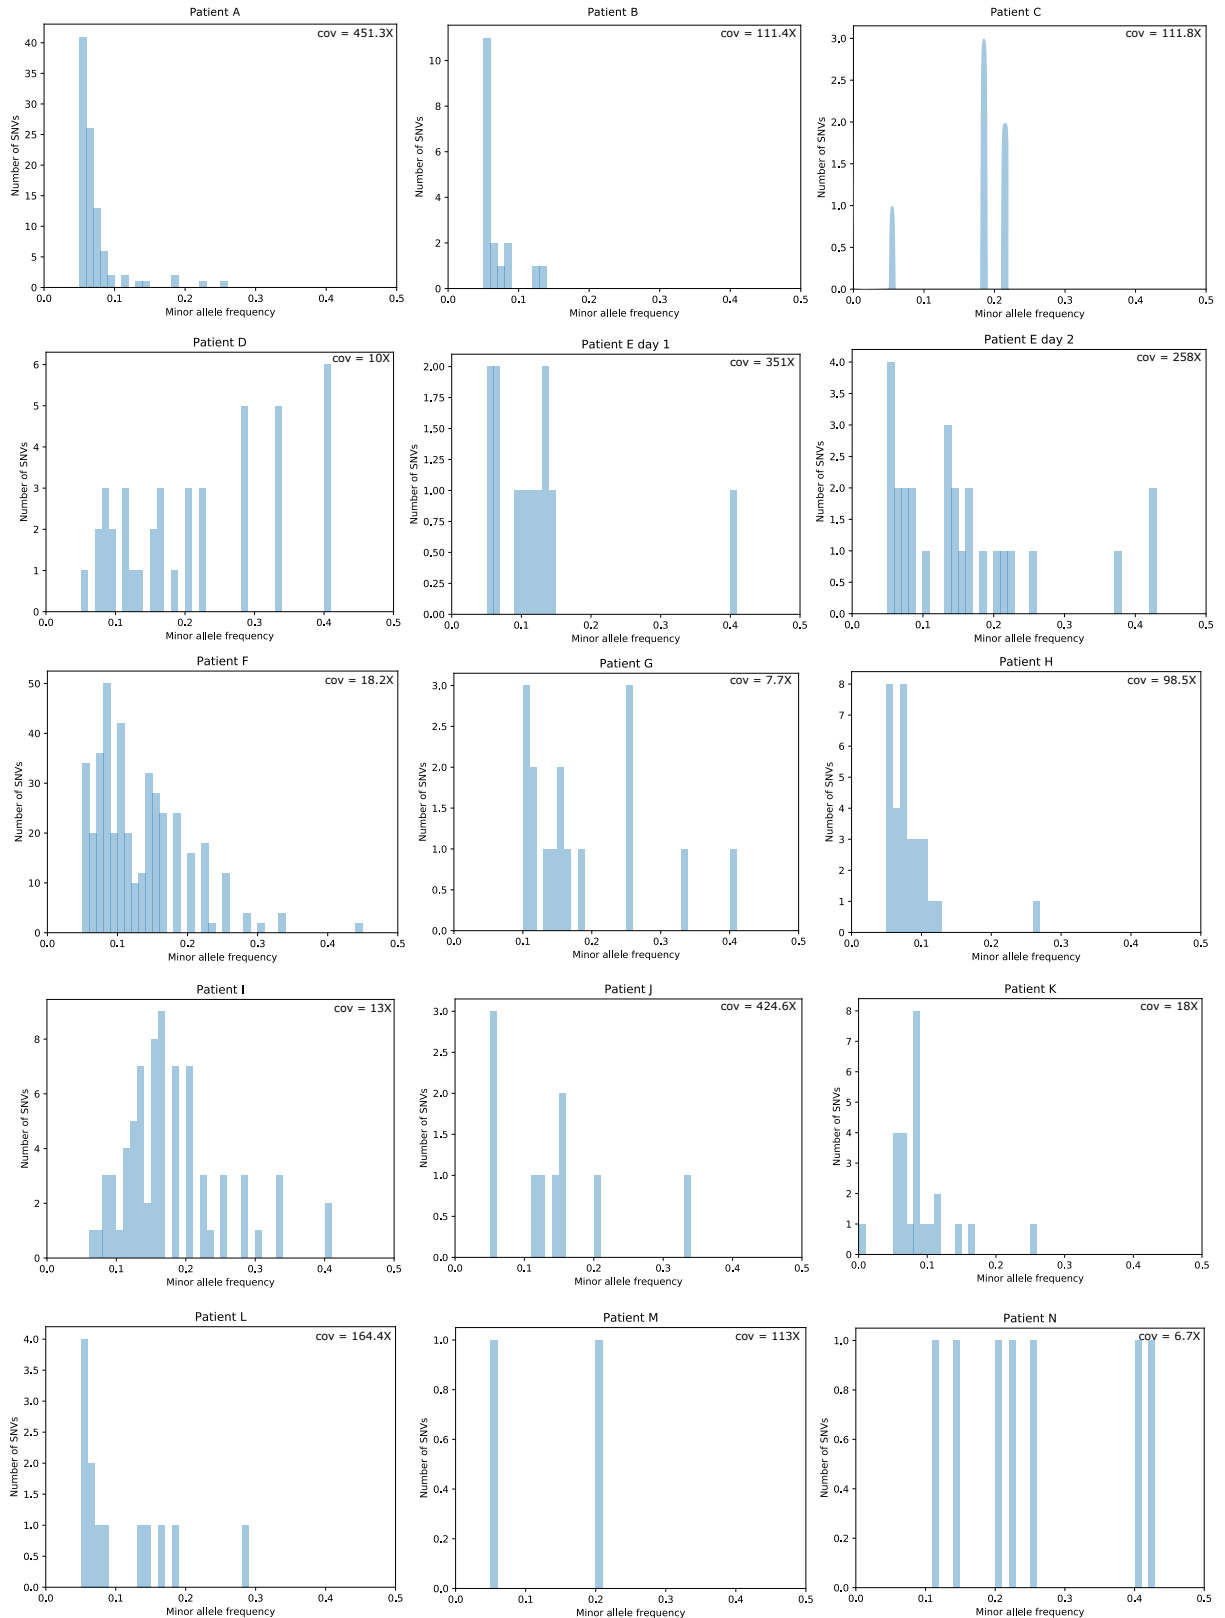

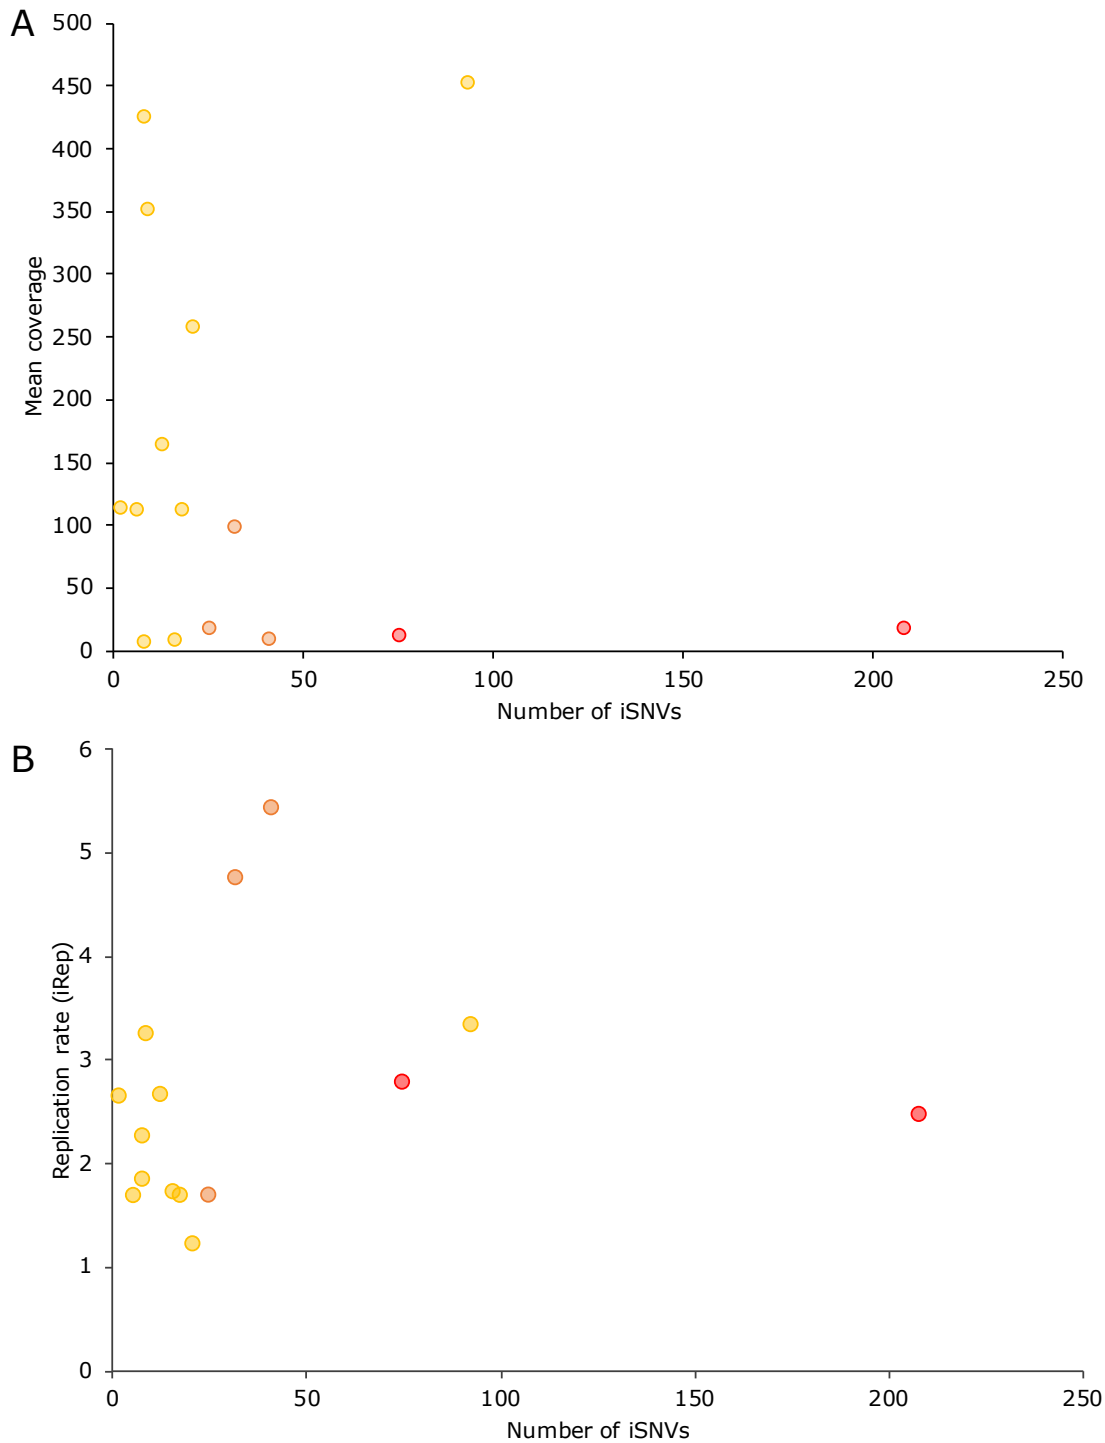

688  
689  
690  
691  
692

**Figure S2. iSNVs numbers are not linked to depth of metagenomic read coverage (A) or replication rate (B).** Patients with strong hypermutation phenotypes are represented in red, weak hypermutation phenotypes in orange, and other samples in yellow.



693

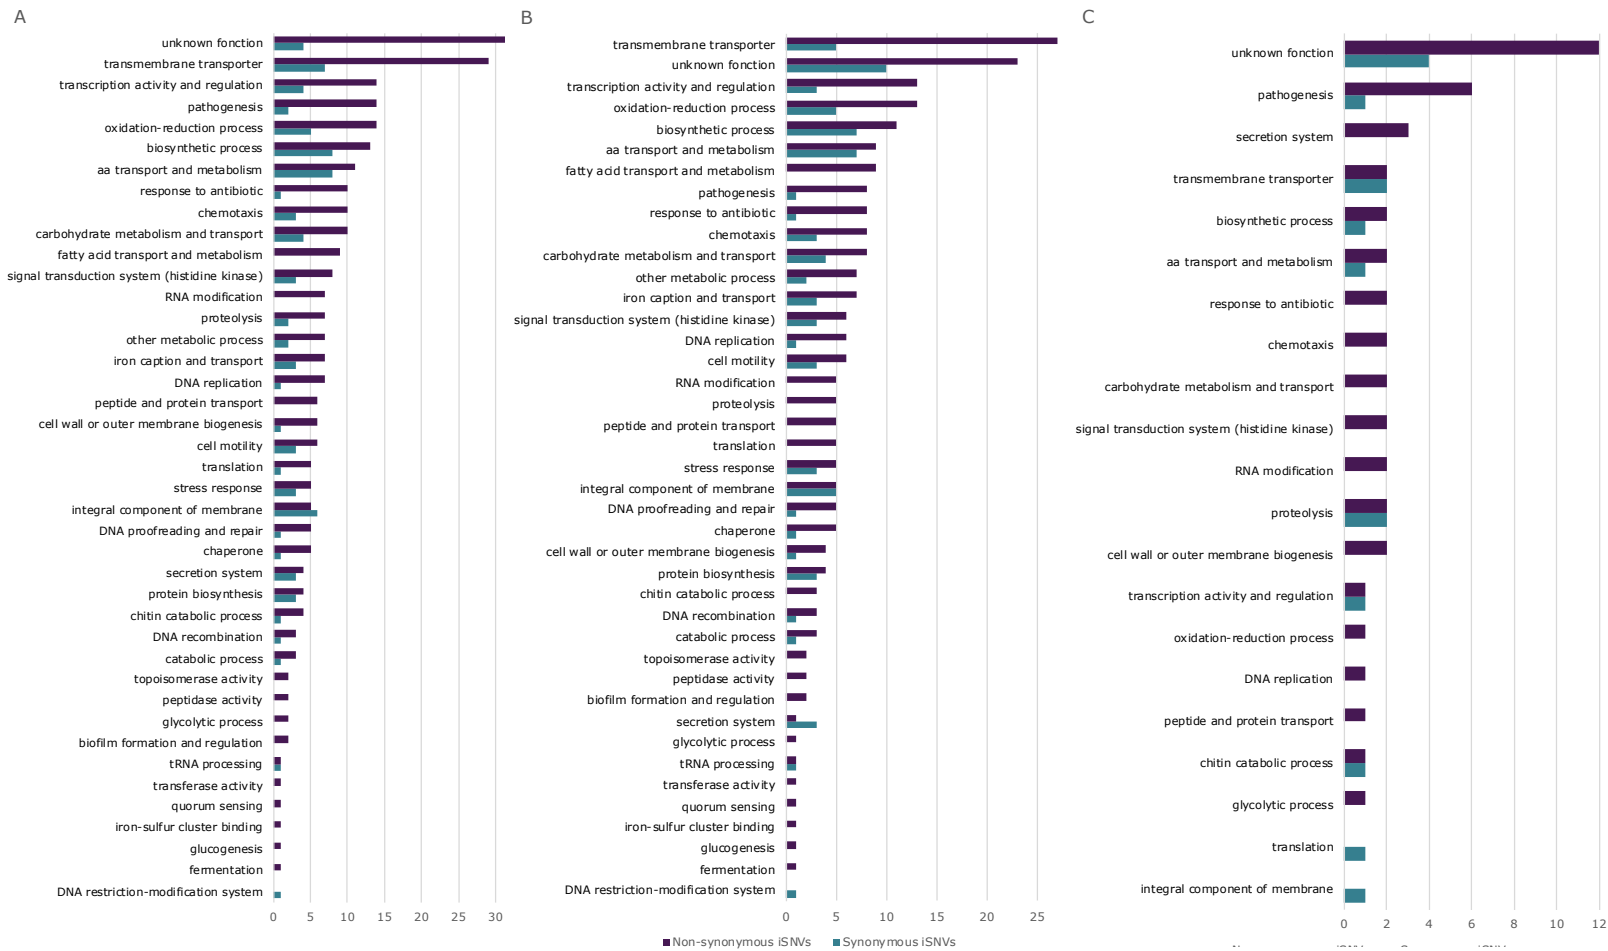

694

695

696

697

698

699

700

701

702

703

704

705

706

707

708

709

710

711

712

**Figure S3. Functional categories of genes containing within-patient variants (iSNVs).** The total number of synonymous and non-synonymous iSNVs in different functional categories was represented for all patients (A), for the 5 patients with hypermutation phenotypes (B), and for the 9 patients without hypermutation phenotypes (C). Categories are ranked in descending order of the number of non-synonymous iSNVs.

713 **REFERENCES**

- 714
- 715 Alcala A, Ramirez G, Solis A, Kim Y, Tan K, Luna O, Nguyen K, et al. 2020. « Structural and  
716 Functional Characterization of Three Type B and C Chloramphenicol Acetyltransferases from  
717 *Vibrio* Species ». *Protein Science : A Publication of the Protein Society*. *Protein Sci.* mars 2020.  
718 <https://doi.org/10.1002/pro.3793>.
- 719
- 720 Ali, Mohammad, Allyson R. Nelson, Anna Lena Lopez, et David A. Sack. 2015. « Updated  
721 Global Burden of Cholera in Endemic Countries ». Édité par Justin V. Remais. *PLOS Neglected*  
722 *Tropical Diseases* 9 (6): e0003832. <https://doi.org/10.1371/journal.pntd.0003832>.
- 723
- 724 Alneberg, Johannes, Brynjar Smári Bjarnason, Ino de Bruijn, Melanie Schirmer, Joshua Quick,  
725 Umer Z Ijaz, Leo Lahti, Nicholas J Loman, Anders F Andersson, et Christopher Quince. 2014.  
726 « Binning Metagenomic Contigs by Coverage and Composition ». *Nature Methods* 11 (11):  
727 1144–1146. <https://doi.org/10.1038/nmeth.3103>.
- 728
- 729 Bachmann, Nathan L., Rebecca J. Rockett, Verlainé Joy Timms, et Vitali Sintchenko. 2018.  
730 « Advances in Clinical Sample Preparation for Identification and Characterization of Bacterial  
731 Pathogens Using Metagenomics ». *Frontiers in Public Health* 6 (décembre).  
732 <https://doi.org/10.3389/fpubh.2018.00363>.
- 733
- 734 Bankevich, Anton, Sergey Nurk, Dmitry Antipov, Alexey A Gurevich, Mikhail Dvorkin,  
735 Alexander S Kulikov, Valery M Lesin, et al. 2012. « SPAdes: A New Genome Assembly  
736 Algorithm and Its Applications to Single-Cell Sequencing ». *Journal of Computational Biology*  
737 19 (5): 455–477. <https://doi.org/10.1089/cmb.2012.0021>.
- 738
- 739 Brenzinger, Susanne, Lizah T. van der Aart, Gilles P. van Wezel, Jean-Marie Lacroix, Timo  
740 Glatter, et Ariane Briegel. 2019. « Structural and Proteomic Changes in Viable but Non-  
741 culturable *Vibrio cholerae* ». *Frontiers in Microbiology* 10  
742 <https://doi.org/10.3389/fmicb.2019.00793>.
- 743
- 744 Brown, Christopher T., Matthew R. Olm, Brian C. Thomas, et Jillian F. Banfield. 2016.  
745 « Measurement of Bacterial Replication Rates in Microbial Communities ». *Nature*  
746 *Biotechnology* 34 (12): 1256–63. <https://doi.org/10.1038/nbt.3704>.
- 747
- 748 Camacho, Anton, Malika Bouhenia, Reema Alyusfi, Abdulhakeem Alkohani, Munna Abdulla  
749 Mohammed Naji, Xavier de Radiguès, Abdinasir M Abubakar, et al. 2018. « Cholera Epidemic in  
750 Yemen, 2016–18: An Analysis of Surveillance Data ». *The Lancet Global Health* 6 (6): e680–90.  
751 [https://doi.org/10.1016/S2214-109X\(18\)30230-4](https://doi.org/10.1016/S2214-109X(18)30230-4).
- 752
- 753 Chu, Nathaniel D., Sean A. Clarke, Sonia Timberlake, Martin F. Polz, Alan D. Grossman, et Eric  
754 J. Alm. 2017. « A Mobile Element in MutS Drives Hypermutation in a Marine *Vibrio* ». *MBio* 8  
755 (1). <https://doi.org/10.1128/mBio.02045-16>.
- 756
- 757 Croucher, Nicholas J., Simon R. Harris, Christophe Fraser, Michael A. Quail, John Burton, Mark  
758 van der Linden, Lesley McGee, et al. 2011. « Rapid Pneumococcal Evolution in Response to  
759 Clinical Interventions ». *Science* 331 (6016): 430–34. <https://doi.org/10.1126/science.1198545>.

- 760  
761 Darmon, Elise, Manuel A. Lopez-Vernaza, Anne C. Helness, Amanda Borking, Emily Wilson,  
762 Zubin Thacker, Laura Wardrope, et David R. F. Leach. 2007. « SbcCD Regulation and  
763 Localization in Escherichia Coli ». *Journal of Bacteriology* 189 (18): 6686-94.  
764 <https://doi.org/10.1128/JB.00489-07>.  
765  
766 Denamur, Erick, Guillaume Lecointre, Pierre Darlu, Olivier Tenaillon, Cécile Acquaviva,  
767 Chalom Sayada, Ivana Sunjevaric, et al. 2000. « Evolutionary Implications of the Frequent  
768 Horizontal Transfer of Mismatch Repair Genes ». *Cell* 103 (5): 711-21.  
769 [https://doi.org/10.1016/S0092-8674\(00\)00175-6](https://doi.org/10.1016/S0092-8674(00)00175-6).  
770  
771 Didelot, Xavier, Christophe Fraser, Jennifer Gardy, et Caroline Colijn. 2017. « Genomic  
772 Infectious Disease Epidemiology in Partially Sampled and Ongoing Outbreaks ». *Molecular  
773 Biology and Evolution* 34 (4): 997-1007. <https://doi.org/10.1093/molbev/msw275>.  
774  
775 Didelot, Xavier, Bo Pang, Zhemin Zhou, Angela McCann, Peixiang Ni, Dongfang Li, Mark  
776 Achtman, et Biao Kan. 2015. « The Role of China in the Global Spread of the Current Cholera  
777 Pandemic ». *PLOS Genetics* 11 (3): e1005072. <https://doi.org/10.1371/journal.pgen.1005072>.  
778  
779 Didelot, Xavier, A Sarah Walker, Tim E Peto, Derrick W Crook, et Daniel J Wilson. 2016.  
780 « Within-Host Evolution of Bacterial Pathogens. » *Nature Publishing Group* 14 (3): 150–162.  
781 <https://doi.org/10.1038/nrmicro.2015.13>.  
782  
783 Domman, Daryl, Fahima Chowdhury, Ashraful I. Khan, Matthew J. Dorman, Ankur Mutreja,  
784 Muhammad Ikhtear Uddin, Anik Paul, et al. 2018. « Defining Endemic Cholera at Three Levels  
785 of Spatiotemporal Resolution within Bangladesh ». *Nature Genetics* 50 (7): 951-55.  
786 <https://doi.org/10.1038/s41588-018-0150-8>.  
787  
788 Eisenstark, Abraham. 2010. « Genetic Diversity among Offspring from Archived Salmonella  
789 enterica ssp. enterica Serovar Typhimurium (Demerec Collection): In Search of Survival  
790 Strategies ». *Annual Review of Microbiology* 64 (1): 277-92.  
791 <https://doi.org/10.1146/annurev.micro.091208.073614>.  
792  
793 Eren, A. Murat, Özcan C. Esen, Christopher Quince, Joseph H. Vineis, Hilary G. Morrison,  
794 Mitchell L. Sogin, et Tom O. Delmont. 2015. « Anvi'o: An Advanced Analysis and Visualization  
795 Platform for 'omics Data ». *PeerJ* 3: e1319. <https://doi.org/10.7717/peerj.1319>.  
796  
797 Eren, A. Murat, Joseph H. Vineis, Hilary G. Morrison, et Mitchell L. Sogin. 2013. « A Filtering  
798 Method to Generate High Quality Short Reads Using Illumina Paired-End Technology ». *PLOS  
799 ONE* 8 (6): e66643. <https://doi.org/10.1371/journal.pone.0066643>.  
800  
801 Foster, P. L., G. Gudmundsson, J. M. Trimarchi, H. Cai, et M. F. Goodman. 1995.  
802 « Proofreading-Defective DNA Polymerase II Increases Adaptive Mutation in Escherichia Coli ». *Proceedings of the National Academy of Sciences* 92 (17): 7951-55.  
803 <https://doi.org/10.1073/pnas.92.17.7951>.  
804  
805  
806 Funchain, Pauline, Annie Yeung, Jean Lee Stewart, Rose Lin, Malgorzata M. Slupska, et Jeffrey

- 807 H. Miller. 2000. « The Consequences of Growth of a Mutator Strain of Escherichia Coli as  
808 Measured by Loss of Function Among Multiple Gene Targets and Loss of Fitness ». *Genetics*  
809 154 (3): 959-70.  
810
- 811 Gardy, Jennifer L., et Nicholas J. Loman. 2018. « Towards a Genomics-Informed, Real-Time,  
812 Global Pathogen Surveillance System ». *Nature Reviews Genetics* 19 (1): 9-20.  
813 <https://doi.org/10.1038/nrg.2017.88>.  
814
- 815 Garud, Nandita R., Benjamin H. Good, Oskar Hallatschek, et Katherine S. Pollard. 2019.  
816 « Evolutionary Dynamics of Bacteria in the Gut Microbiome within and across Hosts ». *PLOS*  
817 *Biology* 17 (1): e3000102. <https://doi.org/10.1371/journal.pbio.3000102>.  
818
- 819 Giraud, Antoine, Ivan Matic, Olivier Tenaille, Antonio Clara, Miroslav Radman, Michel Fons,  
820 et François Taddei. 2001. « Costs and Benefits of High Mutation Rates: Adaptive Evolution of  
821 Bacteria in the Mouse Gut ». *Science* 291 (5513): 2606-8.  
822 <https://doi.org/10.1126/science.1056421>.  
823
- 824 Hadfield, James, Nicholas J. Croucher, Richard J. Goater, Khalil Abudahab, David M. Aanensen,  
825 et Simon R. Harris. 2018. « Phandango: An Interactive Viewer for Bacterial Population  
826 Genomics ». *Bioinformatics* 34 (2): 292-93. <https://doi.org/10.1093/bioinformatics/btx610>.  
827
- 828 Harris, Jason B., Ashraful I. Khan, Regina C. LaRocque, David J. Dorer, Fahima Chowdhury,  
829 Abu S. G. Faruque, David A. Sack, Edward T. Ryan, Firdausi Qadri, et Stephen B. Calderwood.  
830 2005. « Blood Group, Immunity, and Risk of Infection with *Vibrio Cholerae* in an Area of  
831 Endemicity ». *Infection and Immunity* 73 (11): 7422-27. [https://doi.org/10.1128/IAI.73.11.7422-](https://doi.org/10.1128/IAI.73.11.7422-7427.2005)  
832 [7427.2005](https://doi.org/10.1128/IAI.73.11.7422-7427.2005).  
833
- 834 Harris, Jason B., Regina C. LaRocque, Fahima Chowdhury, Ashraful I. Khan, Tanya  
835 Logvinenko, Abu S. G. Faruque, Edward T. Ryan, Firdausi Qadri, et Stephen B. Calderwood.  
836 2008. « Susceptibility to *Vibrio cholerae* Infection in a Cohort of Household Contacts of Patients  
837 with Cholera in Bangladesh ». *PLoS Neglected Tropical Diseases* 2 (4).  
838 <https://doi.org/10.1371/journal.pntd.0000221>.  
839
- 840 Hyatt, Doug, Gwo-Liang Chen, Philip F. LoCascio, Miriam L. Land, Frank W. Larimer, et Loren  
841 J. Hauser. 2010. « Prodigal: Prokaryotic Gene Recognition and Translation Initiation Site  
842 Identification ». *BMC Bioinformatics* 11 (1): 119. <https://doi.org/10.1186/1471-2105-11-119>.  
843
- 844 Jolivet-Gougeon, Anne, Bela Kovacs, Sandrine Le Gall-David, Hervé Le Bars, Latifa  
845 Bousarghin, Martine Bonnaure-Mallet, Bernard Lobel, François Guillé, Claude-James Soussy, et  
846 Peter Tenke. 2011. « Bacterial hypermutation: clinical implications ». *Journal of Medical*  
847 *Microbiology*, 60 (5): 563-73. <https://doi.org/10.1099/jmm.0.024083-0>.  
848
- 849 Kang, Dongwan, Feng Li, Edward S Kirton, Ashleigh Thomas, Rob S Egan, Hong An, et Zhong  
850 Wang. 2019. « MetaBAT 2: An Adaptive Binning Algorithm for Robust and Efficient Genome  
851 Reconstruction from Metagenome Assemblies ». Preprint. PeerJ Preprints.  
852 <https://doi.org/10.7287/peerj.preprints.27522v1>.  
853
- 853 Kendall, Emily A, Fahima Chowdhury, Yasmin Begum, Ashraful I Khan, Shan Li, James H

- 854 Thierer, Jason Bailey, et al. 2010. « Relatedness of *Vibrio Cholerae* O1/O139 Isolates from  
855 Patients and Their Household Contacts, Determined by Multilocus Variable-Number Tandem-  
856 Repeat Analysis. » *Journal of Bacteriology* 192 (17): 4367–4376.  
857 <https://doi.org/10.1128/JB.00698-10>.  
858
- 859 Kim, Daehwan, Li Song, Florian P. Breitwieser, et Steven L. Salzberg. 2016. « Centrifuge: Rapid  
860 and Sensitive Classification of Metagenomic Sequences ». *Genome Research* 26 (12): 1721–  
861 1729. <https://doi.org/10.1101/gr.210641.116>.  
862
- 863 King, Aaron A., Edward L. Ionides, Mercedes Pascual, et Menno J. Bouma. 2008. « Inapparent  
864 Infections and Cholera Dynamics ». *Nature* 454 (7206): 877-80.  
865 <https://doi.org/10.1038/nature07084>.  
866
- 867 Kunkel, Thomas A., et Dorothy A. Erie. 2005. « Dna mismatch repair ». *Annual Review of*  
868 *Biochemistry* 74 (1): 681-710. <https://doi.org/10.1146/annurev.biochem.74.082803.133243>.  
869
- 870 Labat, Françoise, Olivier Pradillon, Louis Garry, Michel Peuchmaur, Bruno Fantin, et Erick  
871 Denamur. 2005. « Mutator Phenotype Confers Advantage in *Escherichia Coli* Chronic Urinary  
872 Tract Infection Pathogenesis ». *FEMS Immunology & Medical Microbiology* 44 (3): 317-21.  
873 <https://doi.org/10.1016/j.femsim.2005.01.003>.  
874
- 875 Langmead, Ben, et Steven L Salzberg. 2012. « Fast Gapped-Read Alignment with Bowtie 2. »  
876 *Nature Methods* 9 (4): 357–359. <https://doi.org/10.1038/nmeth.1923>.  
877
- 878 Lee, Seung-Joo, Rou-Jia Sung, et Gregory L. Verdine. 2019. « Mechanism of DNA Lesion  
879 Homing and Recognition by the Uvr Nucleotide Excision Repair System ». Research article.  
880 Research. 2019. <https://spj.sciencemag.org/research/2019/5641746/>.  
881
- 882 Levade, Inès, Morteza M. Saber, Firas Midani, Fahima Chowdhury, Ashraful I. Khan, Yasmin A.  
883 Begum, Edward T. Ryan, et al. 2020. « Predicting *Vibrio Cholerae* Infection and Disease  
884 Severity Using Metagenomics in a Prospective Cohort Study ». *BioRxiv*, février,  
885 2020.02.25.960930. <https://doi.org/10.1101/2020.02.25.960930>.  
886
- 887 Levade, Inès, Yves Terrat, Jean-Baptiste Leducq, Ana A. Weil, Leslie M. Mayo-Smith, Fahima  
888 Chowdhury, Ashraful I. Khan, et al. 2017. « *Vibrio cholerae* genomic diversity within and  
889 between patients ». *Microbial Genomics* 3 (12). <https://doi.org/10.1099/mgen.0.000142>.  
890
- 891 Li, Dinghua, Ruibang Luo, Chi-Man Liu, Chi-Ming Leung, Hing-Fung Ting, Kunihiko  
892 Sadakane, Hiroshi Yamashita, et Tak-Wah Lam. 2016. « MEGAHIT v1.0: A Fast and Scalable  
893 Metagenome Assembler Driven by Advanced Methodologies and Community Practices ». *Methods (San Diego, Calif.)* 102: 3–11. <https://doi.org/10.1016/j.ymeth.2016.02.020>.  
894  
895
- 896 Lieberman, Tami D, Kelly B Flett, Idan Yelin, Thomas R Martin, Alexander J McAdam, Gregory  
897 P Priebe, et Roy Kishony. 2013. « Genetic variation of a bacterial pathogen within individuals  
898 with cystic fibrosis provides a record of selective pressures ». *Nature Genetics* 46 (1): 82-87.  
899 <https://doi.org/10.1038/ng.2848>.  
900



- 901 Lovett, Susan T. 2011. « The DNA exonucleases of Escherichia coli ». *EcoSal Plus* 4 (2).  
902 <https://doi.org/10.1128/ecosalplus.4.4.7>.  
903
- 904 Lu, A.-Lien, Xianghong Li, Yesong Gu, Patrick M. Wright, et Dau-Yin Chang. 2001. « Repair of  
905 Oxidative DNA Damage ». *Cell Biochemistry and Biophysics* 35 (2): 141-70.  
906 <https://doi.org/10.1385/CBB:35:2:141>.  
907
- 908 Madden, Tom. 2003. *The BLAST Sequence Analysis Tool. The NCBI Handbook [Internet]*.  
909 National Center for Biotechnology Information (US).  
910 <https://www.ncbi.nlm.nih.gov/books/NBK21097/>.  
911
- 912 Marvig, Rasmus Lykke, Helle Krogh Johansen, Søren Molin, et Lars Jelsbak. 2013. « Genome  
913 Analysis of a Transmissible Lineage of Pseudomonas Aeruginosa Reveals Pathoadaptive  
914 Mutations and Distinct Evolutionary Paths of Hypermutators ». *PLOS Genetics* 9 (9): e1003741.  
915 <https://doi.org/10.1371/journal.pgen.1003741>.  
916
- 917 McDonald, John H., et Martin Kreitman. 1991. « Adaptive Protein Evolution at the Adh Locus in  
918 Drosophila ». *Nature* 351 (6328): 652-54. <https://doi.org/10.1038/351652a0>.  
919
- 920 Midani, Firas S., Ana A. Weil, Fahima Chowdhury, Yasmin A. Begum, Ashraful I. Khan, Meti  
921 D. Debela, Heather K. Durand, et al. 2018. « Human Gut Microbiota Predicts Susceptibility to  
922 Vibrio Cholerae Infection ». *The Journal of Infectious Diseases* 218 (4): 645-53.  
923 <https://doi.org/10.1093/infdis/jiy192>.  
924
- 925 Nayfach, Stephen, Beltran Rodriguez-Mueller, Nandita Garud, et Katherine S. Pollard. 2016.  
926 « An Integrated Metagenomics Pipeline for Strain Profiling Reveals Novel Patterns of Bacterial  
927 Transmission and Biogeography ». *Genome Research* 26 (11): 1612-25.  
928 <https://doi.org/10.1101/gr.201863.115>.  
929
- 930 Nelson, Eric J., Jason B. Harris, J. Glenn Morris, Stephen B. Calderwood, et Andrew Camilli.  
931 2009. « Cholera transmission: the host, pathogen and bacteriophage dynamic ». *Nature Reviews*  
932 *Microbiology* 7 (10): 693-702. <https://doi.org/10.1038/nrmicro2204>.  
933
- 934 O'Hara, Brendan J., Zachary K. Barth, Amelia C. McKitterick, et Kimberley D. Seed. 2017. « A  
935 Highly Specific Phage Defense System Is a Conserved Feature of the Vibrio Cholerae  
936 Mobilome ». *PLOS Genetics* 13 (6): e1006838. <https://doi.org/10.1371/journal.pgen.1006838>.  
937
- 938 Oliver, A., et A. Mena. 2010. « Bacterial Hypermutation in Cystic Fibrosis, Not Only for  
939 Antibiotic Resistance ». *Clinical Microbiology and Infection* 16 (7): 798-808.  
940 <https://doi.org/10.1111/j.1469-0691.2010.03250.x>.  
941
- 942 Olivier, Verena, G. Kenneth Haines, Yanping Tan, et Karla J. Fullner Satchell. 2007.  
943 « Hemolysin and the Multifunctional Autoprocessing RTX Toxin Are Virulence Factors during  
944 Intestinal Infection of Mice with Vibrio Cholerae El Tor O1 Strains ». *Infection and Immunity* 75  
945 (10): 5035-42. <https://doi.org/10.1128/IAI.00506-07>.  
946

- 947 Olm, Matthew R., Alexander Crits-Christoph, Keith Bouma-Gregson, Brian Firek, Michael J.  
948 Morowitz, et Jillian F. Banfield. 2020. « InStrain Enables Population Genomic Analysis from  
949 Metagenomic Data and Rigorous Detection of Identical Microbial Strains ». *BioRxiv*, janvier,  
950 2020.01.22.915579. <https://doi.org/10.1101/2020.01.22.915579>.  
951
- 952 Olson, Rich, et Eric Gouaux. 2005. « Crystal Structure of the Vibrio Cholerae Cytolysin (VCC)  
953 Pro-Toxin and Its Assembly into a Heptameric Transmembrane Pore ». *Journal of Molecular  
954 Biology* 350 (5): 997-1016. <https://doi.org/10.1016/j.jmb.2005.05.045>.  
955
- 956 Page, Andrew J., Carla A. Cummins, Martin Hunt, Vanessa K. Wong, Sandra Reuter, Matthew  
957 T.G. Holden, Maria Fookes, Daniel Falush, Jacqueline A. Keane, et Julian Parkhill. 2015.  
958 « Roary: Rapid Large-Scale Prokaryote Pan Genome Analysis ». *Bioinformatics* 31 (22):  
959 3691-93. <https://doi.org/10.1093/bioinformatics/btv421>.  
960
- 961 Parks, Donovan H., Michael Imelfort, Connor T. Skennerton, Philip Hugenholtz, et Gene W.  
962 Tyson. 2015. « CheckM: Assessing the Quality of Microbial Genomes Recovered from Isolates,  
963 Single Cells, and Metagenomes ». *Genome Research* 25 (7): 1043-55.  
964 <https://doi.org/10.1101/gr.186072.114>.  
965
- 966 Phelps, Matthew D., Lone Simonsen, et Peter K. M. Jensen. 2019. « Individual and Household  
967 Exposures Associated with Cholera Transmission in Case–Control Studies: A Systematic  
968 Review ». *Tropical Medicine & International Health* 24 (10): 1151-68.  
969 <https://doi.org/10.1111/tmi.13293>.  
970
- 971 Quince, Christopher, Alan W Walker, Jared T Simpson, Nicholas J Loman, et Nicola Segata.  
972 2017. « Shotgun Metagenomics, from Sampling to Analysis ». *Nature Biotechnology* 35 (9):  
973 833-44. <https://doi.org/10.1038/nbt.3935>.  
974
- 975 Ram, Geeta, John Chen, Krishan Kumar, Hope F. Ross, Carles Ubeda, Priyadarshan K. Damle,  
976 Kristin D. Lane, José R. Penadés, Gail E. Christie, et Richard P. Novick. 2012. « Staphylococcal  
977 Pathogenicity Island Interference with Helper Phage Reproduction Is a Paradigm of Molecular  
978 Parasitism ». *Proceedings of the National Academy of Sciences* 109 (40): 16300-305.  
979 <https://doi.org/10.1073/pnas.1204615109>.  
980
- 981 Satchell, Karla J. F., Christopher J. Jones, Jennifer Wong, Jessica Queen, Shivani Agarwal, et  
982 Fitnat H. Yildiz. 2016. « Phenotypic Analysis Reveals That the 2010 Haiti Cholera Epidemic Is  
983 Linked to a Hypervirulent Strain ». *Infection and Immunity* 84 (9): 2473-81.  
984 <https://doi.org/10.1128/IAI.00189-16>.  
985
- 986 Scholz, Matthias, Doyle V. Ward, Edoardo Pasolli, Thomas Tolio, Moreno Zolfo, Francesco  
987 Asnicar, Duy Tin Truong, Adrian Tett, Ardythe L. Morrow, et Nicola Segata. 2016. « Strain-  
988 Level Microbial Epidemiology and Population Genomics from Shotgun Metagenomics ». *Nature  
989 Methods* 13 (5): 435-38. <https://doi.org/10.1038/nmeth.3802>.  
990
- 991 Seed, Kimberley D., Kip L. Bodi, Andrew M. Kropinski, Hans-Wolfgang Ackermann, Stephen  
992 B. Calderwood, Firdausi Qadri, et Andrew Camilli. 2011. « Evidence of a Dominant Lineage of

- 993 Vibrio Cholerae-Specific Lytic Bacteriophages Shed by Cholera Patients over a 10-Year Period  
994 in Dhaka, Bangladesh ». *MBio* 2 (1). <https://doi.org/10.1128/mBio.00334-10>.  
995
- 996 Seed, Kimberley D., Shah M. Faruque, John J. Mekalanos, Stephen B. Calderwood, Firdausi  
997 Qadri, et Andrew Camilli. 2012. « Phase Variable O Antigen Biosynthetic Genes Control  
998 Expression of the Major Protective Antigen and Bacteriophage Receptor in *Vibrio cholerae* O1 ».   
999 Édité par Karla J. F. Satchell. *PLoS Pathogens* 8 (9): e1002917.  
1000 <https://doi.org/10.1371/journal.ppat.1002917>.  
1001
- 1002 Seed, Kimberley D., David W. Lazinski, Stephen B. Calderwood, et Andrew Camilli. 2013. « A  
1003 Bacteriophage Encodes Its Own CRISPR/Cas Adaptive Response to Evade Host Innate  
1004 Immunity ». *Nature* 494 (7438): 489-91. <https://doi.org/10.1038/nature11927>.  
1005
- 1006 Seed, Kimberley D, Minmin Yen, B Jesse Shapiro, Isabelle J Hilaire, Richelle C Charles, Jessica  
1007 E Teng, Louise C Ivers, Jacques Boncy, Jason B Harris, et Andrew Camilli. 2014. « Evolutionary  
1008 Consequences of Intra-Patient Phage Predation on Microbial Populations. » *ELife* 3 (août):  
1009 e03497. <https://doi.org/10.7554/eLife.03497>.  
1010
- 1011 Seemann, Torsten. 2014. « Prokka: Rapid Prokaryotic Genome Annotation ». *Bioinformatics*  
1012 (*Oxford, England*) 30 (14): 2068–2069. <https://doi.org/10.1093/bioinformatics/btu153>.  
1013 ———. 2015. « Snippy: fast bacterial variant calling from NGS reads ». 2015.  
1014 <https://github.com/tseemann/snippy>.  
1015
- 1016 Sieber, Christian M. K., Alexander J. Probst, Allison Sharrar, Brian C. Thomas, Matthias Hess,  
1017 Susannah G. Tringe, et Jillian F. Banfield. 2018. « Recovery of Genomes from Metagenomes via  
1018 a Dereplication, Aggregation and Scoring Strategy ». *Nature Microbiology* 3 (7): 836-43.  
1019 <https://doi.org/10.1038/s41564-018-0171-1>.  
1020
- 1021 Stecher, Glen, Koichiro Tamura, et Sudhir Kumar. 2020. « Molecular Evolutionary Genetics  
1022 Analysis (MEGA) for MacOS ». *Molecular Biology and Evolution* 37 (4): 1237-39.  
1023 <https://doi.org/10.1093/molbev/msz312>.  
1024 The UniProt Consortium. 2019. « UniProt: A Worldwide Hub of Protein Knowledge ». *Nucleic*  
1025 *Acids Research* 47 (D1): D506-15. <https://doi.org/10.1093/nar/gky1049>.  
1026 Tischler, Anna D., et Andrew Camilli. 2004. « Cyclic diguanylate (c-di-GMP) regulates *Vibrio*  
1027 *cholerae* biofilm formation ». *Molecular microbiology* 53 (3): 857-69.  
1028 <https://doi.org/10.1111/j.1365-2958.2004.04155.x>.  
1029  
1030
- 1031 Vezzulli, L., C. Grande, G. Tassistro, I. Brettar, M. G. Höfle, R. P. A. Pereira, D. Mushi, A.  
1032 Pallavicini, P. Vassallo, et C. Pruzzo. 2017. « Whole-Genome Enrichment Provides Deep  
1033 Insights into *Vibrio Cholerae* Metagenome from an African River ». *Microbial Ecology* 73 (3):  
1034 734-38. <https://doi.org/10.1007/s00248-016-0902-x>.  
1035
- 1036 Wang, Hui, Xiaolin Xing, Jipeng Wang, Bo Pang, Ming Liu, Jessie Larios-Valencia, Tao Liu, et  
1037 al. 2018. « Hypermutation-Induced in Vivo Oxidative Stress Resistance Enhances *Vibrio*  
1038 *Cholerae* Host Adaptation ». *PLOS Pathogens* 14 (10): e1007413.  
1039 <https://doi.org/10.1371/journal.ppat.1007413>.



1040  
1041 Weil, Ana A., Mohammad Arifuzzaman, Taufiqur R. Bhuiyan, Regina C. LaRocque, Aaron M.  
1042 Harris, Emily A. Kendall, Azim Hossain, et al. 2009. « Memory T-Cell Responses to Vibrio  
1043 Cholerae O1 Infection ». *Infection and Immunity* 77 (11): 5090-96.  
1044 <https://doi.org/10.1128/IAI.00793-09>.  
1045  
1046 Weil, Ana A., Louise C. Ivers, et Jason B. Harris. 2011. « Cholera: Lessons from Haiti and  
1047 Beyond ». *Current Infectious Disease Reports* 14 (1): 1-8. [https://doi.org/10.1007/s11908-011-](https://doi.org/10.1007/s11908-011-0221-9)  
1048 [0221-9](https://doi.org/10.1007/s11908-011-0221-9).  
1049  
1050 Weil, Ana A., Ashraful I. Khan, Fahima Chowdhury, Regina C. LaRocque, A. S. G. Faruque,  
1051 Edward T. Ryan, Stephen B. Calderwood, Firdausi Qadri, et Jason B. Harris. 2009. « Clinical  
1052 Outcomes in Household Contacts of Patients with Cholera in Bangladesh ». *Clinical Infectious*  
1053 *Diseases* 49 (10): 1473-79. <https://doi.org/10.1086/644779>.  
1054  
1055 Weil, Ana A., et Edward T. Ryan. 2018. « Cholera: Recent Updates ». *Current Opinion in*  
1056 *Infectious Diseases* 31 (5): 455–461. <https://doi.org/10.1097/QCO.0000000000000474>.  
1057 Wood, Derrick E., Jennifer Lu, et Ben Langmead. 2019. « Improved Metagenomic Analysis with  
1058 Kraken 2 ». *Genome Biology* 20 (1): 257. <https://doi.org/10.1186/s13059-019-1891-0>.  
1059  
1060 Wu, Yu-Wei, Blake A. Simmons, et Steven W. Singer. 2016. « MaxBin 2.0: An Automated  
1061 Binning Algorithm to Recover Genomes from Multiple Metagenomic Datasets ». *Bioinformatics*  
1062 32 (4): 605–607. <https://doi.org/10.1093/bioinformatics/btv638>.  
1063  
1064 Zeibell, Krystle, Sharon Aguila, Vivian Yan Shi, Andrea Chan, Hanjing Yang, et Jeffrey H.  
1065 Miller. 2007. « Mutagenesis and Repair in Bacillus Anthracis: The Effect of Mutators ». *Journal*  
1066 *of Bacteriology* 189 (6): 2331-38. <https://doi.org/10.1128/JB.01656-06>.  
1067  
1068 Zhao, Shijie, Tami D. Lieberman, Mathilde Poyet, Kathryn M. Kauffman, Sean M. Gibbons,  
1069 Mathieu Groussin, Ramnik J. Xavier, et Eric J. Alm. 2019. « Adaptive Evolution within Gut  
1070 Microbiomes of Healthy People ». *Cell Host & Microbe* 25 (5): 656-667.e8.  
1071 <https://doi.org/10.1016/j.chom.2019.03.007>.  
1072  
1073
